# Supplementary material for: Unextractable fossil fuels in a 1.5 °C world
Source: Springer Nature journal article supplement (doi:10.1038/s41586-021-03821-8), 2021-09-08
Supplement: 41586_2021_3821_MOESM1_ESM.pdf [file 41586_2021_3821_MOESM1_ESM.pdf]

---

**Supplementary information**

---

**Unextractable fossil fuels in a 1.5 °C world**

---

In the format provided by the  
authors and unedited

1 **Unextractable fossil fuels in a 1.5°C world**

2 Dan Welsby<sup>1,\*</sup>, James Price<sup>2</sup>, Steve Pye<sup>2</sup> and Paul Ekins<sup>1</sup>

3 <sup>1</sup> Institute for Sustainable Resources, University College London

4 <sup>2</sup> UCL Energy Institute, University College London

5

6 \* Corresponding author: daniel.welsby.14@ucl.ac.uk

7

8

9 **Supplementary Information**

10

11 **SI section 1. Estimates of unextractable resources under a 1.5°C scenario**

12 **SI section 2. Embodied carbon in resources estimates, and comparison to McGlade and Ekins**  
13 **(2015) paper**

14 **SI Section 3. Additional scenario results, including sensitivity cases**

15 **SI section 4. Comparison of TIAM-UCL scenarios versus IAM 1.5°C scenarios**

16 **SI section 5. Approach to modelling fossil fuels in TIAM-UCL**

17 **SI section 6. Key assumptions used in TIAM-UCL v4.1.1**

18 **SI section 7. TIMES model formulation**

19 **SI section 8. Correction of original unextractable estimates**

20

21

22

23 **SI section 1. Estimates of unextractable resources under a 1.5°C scenario**

24 Broadening out the estimates to resources is important because a share of non-reserve resources  
 25 come online in future years, and contribute to overall production and eventual emissions. Resources  
 26 include reserves but also a much wider range of the recoverable resource base (see Methods in main  
 27 paper for definitions). Due to the much larger size of the resource base, the unextractable estimates  
 28 are considerably higher than those for reserves (Supplementary Table 1). We do not include kerogen  
 29 oil in our analysis, due to the fact it is not extracted even in lower ambition runs in TIAM-UCL.

30 For oil, the regions with large resource bases that are more carbon intensive and higher cost see a  
 31 larger share unused. This includes Canada, where 92% of the Canadian oil resource base is heavy  
 32 bitumen from oil sands, and Central and South America, where 65% of the resource base is ultra-  
 33 heavy oil. The higher carbon intensity of production, and additional upgrading stages and energy  
 34 inputs that lead to higher production costs, see these regions with some of the highest shares of  
 35 unextractable oil resources.

36 For fossil methane gas, the FSU region sees the largest volume of unextractable resources out to  
 37 2100. This is driven by two main factors. Firstly, the FSU reserve base is sufficiently large to cover the  
 38 bulk of production given declining demand in our scenarios. Secondly, the FSU region holds huge  
 39 volumes of undiscovered fossil methane gas in the Arctic, which as mentioned previously, remain  
 40 largely unextracted.

41 **Supplementary Table 1. Unextractable resources of fossil fuels (% and physical units) by region in 1.5°C**  
 42 **scenario.** Resources refer to technically recoverable resources (see Methods in main paper for additional  
 43 detail). Units include Gb = billion barrels of oil; Tcm = trillion cubic meters; Gt = billion tons (metric).

| Region                                 | Oil        |              |            |              | Fossil methane gas |            |            |            | Coal       |              |            |              |
|----------------------------------------|------------|--------------|------------|--------------|--------------------|------------|------------|------------|------------|--------------|------------|--------------|
|                                        | 2050       |              | 2100       |              | 2050               |            | 2100       |            | 2050       |              | 2100       |              |
|                                        | %          | Gb           | %          | Gb           | %                  | Tcm        | %          | Tcm        | %          | Gt           | %          | Gt           |
| Africa (AFR)                           | 74%        | 203          | 59%        | 164          | 88%                | 68         | 81%        | 62         | 91%        | 41           | 90%        | 41           |
| Australia and other OECD PACIFIC (AUS) | 86%        | 26           | 85%        | 26           | 92%                | 35         | 91%        | 34         | 99%        | 304          | 99%        | 304          |
| Canada (CAN)                           | 98%        | 739          | 98%        | 737          | 92%                | 30         | 89%        | 29         | 99%        | 70           | 99%        | 70           |
| China and India (CHI AND IND)          | 64%        | 57           | 57%        | 50           | 85%                | 58         | 82%        | 57         | 95%        | 1,114        | 94%        | 1,109        |
| Russia and former Soviet states (FSU)  | 82%        | 520          | 71%        | 448          | 88%                | 139        | 84%        | 133        | 99%        | 1,088        | 99%        | 1,087        |
| Central and South America (CSA)        | 90%        | 665          | 85%        | 629          | 93%                | 70         | 92%        | 69         | 94%        | 31           | 93%        | 31           |
| Europe (EUR)                           | 74%        | 66           | 62%        | 55           | 87%                | 32         | 84%        | 31         | 97%        | 214          | 97%        | 214          |
| Middle East (MEA)                      | 73%        | 743          | 54%        | 546          | 80%                | 86         | 67%        | 73         | 100%       | 13           | 100%       | 13           |
| Other Developing Asia (ODA)            | 50%        | 26           | 38%        | 20           | 69%                | 25         | 65%        | 23         | 94%        | 213          | 94%        | 212          |
| USA                                    | 61%        | 200          | 42%        | 138          | 83%                | 69         | 81%        | 66         | 99%        | 867          | 99%        | 866          |
| <b>Global</b>                          | <b>81%</b> | <b>3,336</b> | <b>71%</b> | <b>2,905</b> | <b>86%</b>         | <b>625</b> | <b>81%</b> | <b>590</b> | <b>97%</b> | <b>3,960</b> | <b>97%</b> | <b>3,952</b> |

45 In fact, across all regions where these are located, we find that Arctic oil and fossil methane gas  
 46 resources are not developed. This is critical given continued exploration efforts in the Arctic region,  
 47 despite the high cost, challenging operating conditions, and the threat oil and gas drilling poses to  
 48 diverse and extremely delicate ecosystems. It is clear that there is an abundance of oil and fossil  
 49 methane gas remaining across global regions in reserves to meet demand in a 1.5°C (50%  
 50 probability) scenario, without the development of Arctic resources.

51 Supplementary Figure 1 breaks down unextractable oil and fossil methane gas resources into more  
 52 detailed geological categories, namely unconventional and conventional resources. It highlights that  
 53 unconventional resources account for a much larger share than conventional resources across most  
 54 regions, with the exception of oil and fossil methane gas in the Middle East and Africa, and fossil  
 55 methane gas in FSU. For unconventional oil, their large size but also less favourable economics and  
 56 higher carbon intensity means that 99% of these resources remain unextractable. A higher share of  
 57 unconventional fossil methane gas also remains unextractable (86%), relative to conventional  
 58 resources (74%), again due to higher extractions costs in most regions, with the exception of North  
 59 America.

60 We have explored unextractable resource shares because of the dynamic nature of fossil fuel  
 61 volumes across techno-economic classifications (discussed in detail in the Methods section) and  
 62 because the growth and decline constraints on production technologies in TIAM-UCL (see SI Section  
 63 5) means that not all production out to 2050 (and beyond) will be from designated reserves.  
 64 However, in our 1.5°C scenario, we find that over 75% of the total oil and fossil methane gas  
 65 recoverable resource base must remain unextracted, and for coal the figure is even higher at 97%.

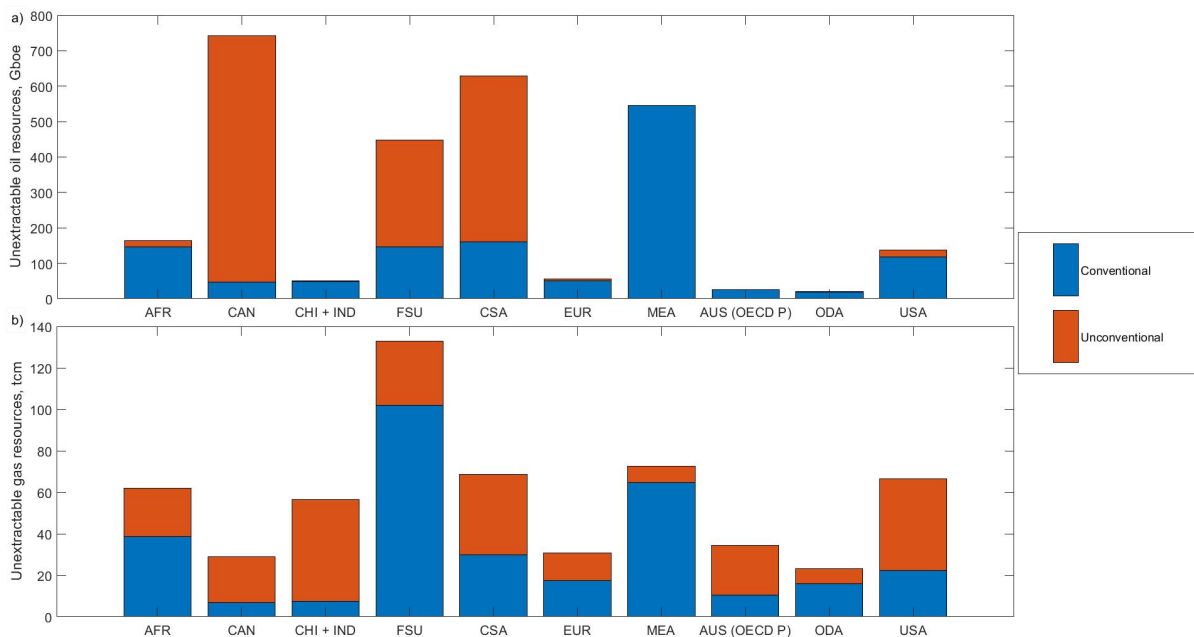

66  
 67 **Supplementary Figure 1. Unextractable oil (a) and gas (b) resources in each region, 2018-2100.** Note that  
 68 arctic oil and gas is included in conventional resources. Conventional and unconventional oil refers to the  
 69 density of the liquid found in the oil reservoir, whereas conventional and unconventional fossil methane gas  
 70 refers to the geological structure of the reservoir (a full discussion, including definitions of conventional and  
 71 unconventional oil and fossil methane gas can be found in the Methods section).

72 For reference, in terms of combined energy content, our total resource base across all fossil fuels is ~  
 73 126 ZJ, with 9% of this produced in total by 2050, and 12% by 2100.

74

75

76 **SI section 2. Embodied carbon in resources estimates, and comparison to McGlade and**  
77 **Ekins (2015) paper**

78 **Embodied carbon in resource estimates**

79 To contextualise the unextractable fossil fuels number, we also estimate the total carbon contained  
80 in the resource base today. We express this in CO<sub>2</sub> emission terms (assuming the embodied carbon is  
81 combusted) to allow for ease of comparison with carbon budget levels. Supplementary Figure 2  
82 shows the embodied CO<sub>2</sub> emissions of a) oil and b) fossil methane gas reserve and resource base in  
83 TIAM-UCL from 2018 (i.e. all of the fossil fuel resources shown in the supply cost curves in Figures 7-  
84 9 in the main paper). For reference, embodied CO<sub>2</sub> emissions in global coal reserves and resources  
85 are 1863 and 7500 Gt CO<sub>2</sub>, respectively.

86 The embodied CO<sub>2</sub> emissions include all emissions through production and consumption, and  
87 therefore if the fossil fuel were used as a feedstock then the embodied emissions from combustion  
88 would be significantly lower. We can observe that conventional oil reserves alone would account for  
89 the entire carbon budget if they were to all be used (i.e. embodied emissions of conventional oil  
90 reserves are > 580 Gt CO<sub>2</sub> as seen in Supplementary Figure 2). The (generally) higher cost of  
91 unconventional oil vis-à-vis conventional reserves explains why most unconventional resources  
92 remain unused under a 1.5°C budget. Additionally, unconventional oil tends to have a higher carbon  
93 intensity of production (due to energy inputs required for extraction and upgrading), although the  
94 carbon intensity of conventional crude oil also varies significantly.

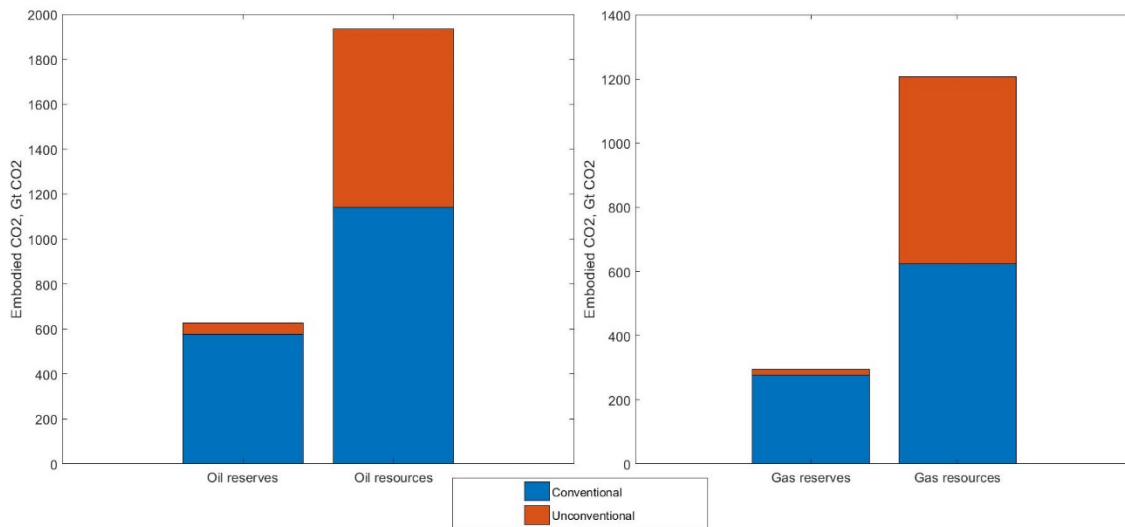

95

96 **Supplementary Figure 2. Embodied CO<sub>2</sub> in oil (a) and gas (b) reserve and resource base in TIAM-UCL, split by**  
97 **resource type.**

98

99 **Comparison to McGlade and Ekins (2015) paper**

100 In Supplementary Figure 3, we compare the estimates of global unextractable fossil fuel reserves in  
101 2050 in this study with those in McGlade and Ekins<sup>1</sup>. 2050 unextractable oil is at 58%, compared to  
102 33% in the earlier study, fossil methane gas is at 56%, compared to 49%, and coal is at 89%,

103 compared to 82%. The increase in estimates reflects the much smaller carbon budget assumed in  
104 this paper, at 580 Gt CO<sub>2</sub> from 2018 onwards, consistent with a 50% probability of limiting average  
105 warming to 1.5°C. McGlade and Ekins had an implicit budget of well over 1000 GtCO<sub>2</sub>.

106 In addition, this analysis reflects an improved representation of fossil fuels, and major updates to the  
107 availability, cost and deployment potential of renewables, zero emission vehicles and options for  
108 mitigation in hard-to-abate sectors (Supplementary sections 5 and 6). For renewable generation  
109 technologies, future costs were updated based on BNEF projections whilst present day costs were  
110 taken from IRENA<sup>2</sup> (see Supplementary Table 21). Additionally, the technical potentials of solar and  
111 wind generation have been updated to reflect the significant potential of these technologies. The  
112 data for the updated technical potentials was taken from the National Renewable Energy Laboratory  
113 (NREL), and applied to each region within TIAM-UCL<sup>3</sup>. In addition to the cost and technical potential  
114 of solar and wind generation, the rate at which these technologies can grow has also been updated  
115 given rapid growth in recent years. For example, solar PV has grown at an average annual rate of  
116 34% between 2010 and 2019, with our upper annual growth rate for solar PV (30%) reflecting this<sup>4</sup>.  
117 For electric vehicles, costs were also updated using data from BNEF.

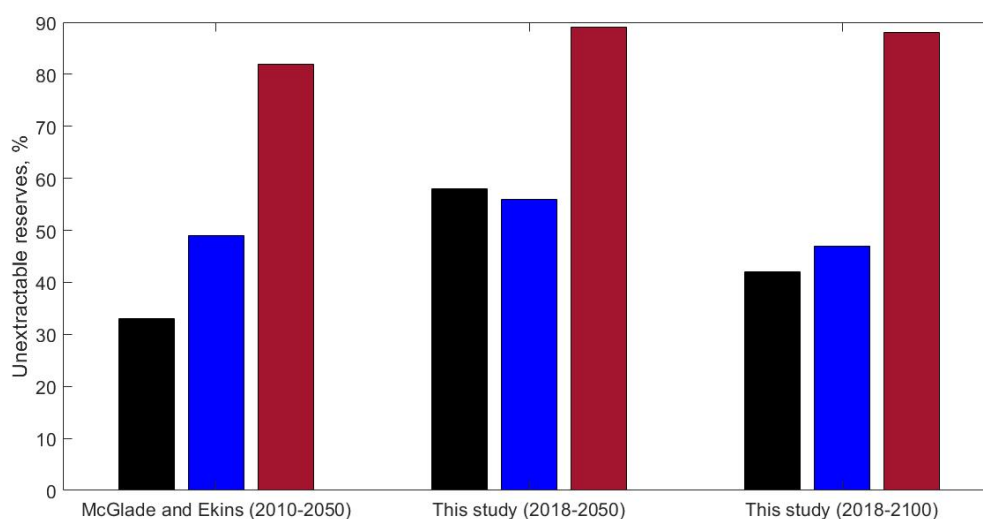

118

119

120 **Supplementary Figure 3. Unextractable reserve estimates of fossil fuels from this work using a 1.5°C**  
121 **scenario, compared with earlier estimates for a 2°C scenario in McGlade and Ekins.** McGlade and Ekins<sup>1</sup> fossil  
122 reserves are from 2010 onwards, whilst this study is from 2018 onwards. McGlade and Ekins used 2P reserves  
123 for both oil (1294 Gb) and fossil methane gas (192 Tcm), and 1P reserves for coal (1004 Gt) whereas this study  
124 uses 1P oil (1276 Gb), gas (155 Tcm) and coal (931 Gt) reserves (for further details see the Methods section in  
125 the main paper).

126 In order to directly compare the difference between volumes of unextractable fossil fuel reserves  
127 and cumulative production between the two studies, Supplementary Table 2 provides context to the  
128 reserve assumptions used in each study, as well as cumulative production from each fossil fuel. It  
129 should be noted that the cumulative production data from McGlade and Ekins<sup>1</sup> has been amended  
130 to start at 2018 using historical production between 2010 and 2018, to ensure a direct comparison  
131 of 2018-2050 cumulative production between this study and the 2015 paper.

132

133

134

135

136 **Supplementary Table 2 (a). Comparison of unextractable reserves and cumulative production between**  
 137 **McGlade and Ekins and this study.** Note cumulative production includes production from both designated  
 138 reserves and from non-reserves.

| Study             | Oil                           |                                   | Fossil methane gas            |                                   | Coal                          |                                   |
|-------------------|-------------------------------|-----------------------------------|-------------------------------|-----------------------------------|-------------------------------|-----------------------------------|
|                   | <i>Unextractable reserves</i> | Cumulative production (2018-2050) | <i>Unextractable reserves</i> | Cumulative production (2018-2050) | <i>Unextractable reserves</i> | Cumulative production (2018-2050) |
|                   | <i>Gb</i>                     |                                   | <i>Tcm</i>                    |                                   | <i>Gt</i>                     |                                   |
| McGlade and Ekins | 431                           | 1129                              | 95                            | 136                               | 819                           | 113                               |
| This study        | 740                           | 748                               | 87                            | 100                               | 826                           | 105                               |

139

140 **Supplementary Table 2 (b). Comparison of unextractable resources and cumulative production between**  
 141 **McGlade and Ekins and this study.** Note cumulative production includes production from both designated  
 142 **reserves and from non-reserves.** Unextractable oil resources from McGlade and Ekins has been altered to  
 143 remove kerogen oil from the resource base, given no kerogen is produced either in the 2°C scenarios from  
 144 McGlade and Ekins, nor the 1.5°C scenarios run in this analysis.

| Study             | Oil                            |                                   | Fossil methane gas             |                                   | Coal                           |                                   |
|-------------------|--------------------------------|-----------------------------------|--------------------------------|-----------------------------------|--------------------------------|-----------------------------------|
|                   | <i>Unextractable resources</i> | Cumulative production (2018-2050) | <i>Unextractable resources</i> | Cumulative production (2018-2050) | <i>Unextractable resources</i> | Cumulative production (2018-2050) |
|                   | <i>Gb</i>                      |                                   | <i>Tcm</i>                     |                                   | <i>Gt</i>                      |                                   |
| McGlade and Ekins | 2783                           | 1129                              | 504                            | 136                               | 3900                           | 113                               |
| This study        | 3331                           | 748                               | 625                            | 100                               | 3960                           | 105                               |

145

146

147 **SI Section 3. Additional scenario results, including sensitivity cases**

148 As part of our analysis of unextractable fossil fuels under a 1.5°C compatible carbon budget (50%  
 149 probability), we undertook a range of other scenarios, including optimistic (1.5D-HighCCS) and less  
 150 optimistic (1.5D-LowCCS) outlooks for CCS, an important technology for prolonging fossil use,  
 151 increased biomass availability as an alternative primary energy source (1.5D-HighBio), and lower  
 152 demands for selected energy services (1.5D-LowDemand). The Methods section of the main paper  
 153 provides a description of scenarios.

154 In the ‘1.5D-LowCCS’ (2.5% upper annual growth rate (AGR), compared with 5% upper AGR in central  
 155 1.5D scenario) scenario, we find that the model solution is on the margin of infeasibility, with a proxy  
 156 ‘backstop’ technology removing ~ 8.8 Gt CO<sub>2</sub> between 2090 and 2100. This represents ~1.5% of the  
 157 total 1.5°C carbon budget (50% probability) used, and it provides important policy implications that  
 158 lowering the deployment rate of CCS technologies pushes the energy system to the edge of  
 159 infeasibility. It should be noted that we did not run a ‘No CCS’ scenario because the modelling  
 160 solution would have required significantly more of this ‘backstop’ technology. Additionally, the  
 161 developed economies (including the US, the EU, and the UK) deploy more BECCS in the power  
 162 generation sector in our ‘Low CCS’ deployment scenario (compared to our central 1.5D scenario),  
 163 and therefore distributing more of the carbon budget to developing regions.

164 Budinis et al.<sup>5</sup> also explored the implications of various outlooks for CCS on unextractable carbon in a  
 165 below 2°C world, finding that CCS increases production of the total fossil reserve base from 33% in a  
 166 case with no CCS to 65% with CCS. In this paper, we have extended the analysis of varying degrees of  
 167 CCS deployment to regional implications, as well as disaggregating the fossil reserve and resource  
 168 base significantly further. However, we also find that once the carbon budgets are 1.5°C consistent,  
 169 the impact CCS can have on unlocking unextractable carbon is much less significant. For example, in  
 170 Supplementary Table 3, we find unextractable proportions of oil, fossil methane gas and coal are  
 171 only 2%, 2% and 1% lower in our ‘High CCS’ deployment scenario compared to our central 1.5D  
 172 scenario by 2100.

173 We also find that fossil fuel consumption, and therefore emissions, are higher in the 1.5D-HighBio  
 174 scenario where, as expected, the higher availability of biomass allows higher deployment of biomass  
 175 with carbon capture (BECCS) technologies, and therefore more negative emissions. By 2100,  
 176 unextractable reserves of oil, fossil methane gas and coal are 6%, 7% and 3% lower than our central  
 177 1.5D scenario. In terms of the total *resource* base in the ‘High Bio’ scenario, this is particularly the  
 178 case moving towards the second half of the century as proved reserves are depleted. The 1.5D-HiBio  
 179 scenario sees an additional 189 Gb oil, 47 Tcm of fossil methane gas, and 31 Gt of coal resources  
 180 produced above the central 1.5D scenario by 2100.

181

182 **Supplementary Table 3. Unextractable global fossil fuel reserves by scenario**

183

| Scenario       | Oil  |     |      |     | Fossil methane gas |     |      |     | Coal |     |      |     |
|----------------|------|-----|------|-----|--------------------|-----|------|-----|------|-----|------|-----|
|                | 2050 |     | 2100 |     | 2050               |     | 2100 |     | 2050 |     | 2100 |     |
|                | %    | Gb  | %    | Gb  | %                  | Tcm | %    | Tcm | %    | Gt  | %    | Gt  |
| 1.5D           | 58%  | 740 | 42%  | 541 | 56%                | 87  | 47%  | 73  | 89%  | 826 | 88%  | 818 |
| 1.5D-LowCCS    | 58%  | 740 | 42%  | 549 | 57%                | 88  | 48%  | 75  | 89%  | 833 | 89%  | 826 |
| 1.5D-HighCCS   | 58%  | 730 | 40%  | 513 | 55%                | 85  | 45%  | 70  | 88%  | 819 | 87%  | 809 |
| 1.5D-HighBio   | 55%  | 702 | 36%  | 471 | 53%                | 82  | 40%  | 63  | 87%  | 811 | 85%  | 787 |
| 1.5D-LowDemand | 58%  | 739 | 42%  | 549 | 55%                | 86  | 45%  | 72  | 88%  | 822 | 87%  | 811 |



184 Supplementary Figure 4 shows unextractable fossil fuel reserves by 2050 for oil (a) and fossil  
 185 methane gas (b) across some key producing regions. Of particular interest to note is the minimal  
 186 changes between regions across our 1.5°C consistent scenarios, driven by the carbon budget leaving  
 187 very little room for manoeuvre. The key exception is the Other Developing Asia (ODA) region for  
 188 fossil methane gas. In the high CCS, high biomass availability, and low demand scenarios, more of  
 189 ODA's fossil methane gas reserves are developed. Two key caveats should be noted in relation to  
 190 these scenario results. Firstly, this shows the critical role of widespread CCS deployment to facilitate  
 191 gas consumption, particularly in regions where it is displacing coal in the industrial sector. Secondly,  
 192 and as discussed further below, the low demand scenario is interesting as the remaining carbon  
 193 budget is redistributed (given lower emissions from aviation and the chemicals sector) to developing  
 194 regions allowing slightly more room to manoeuvre in terms of decarbonisation in the transportation  
 195 and industrial sectors.

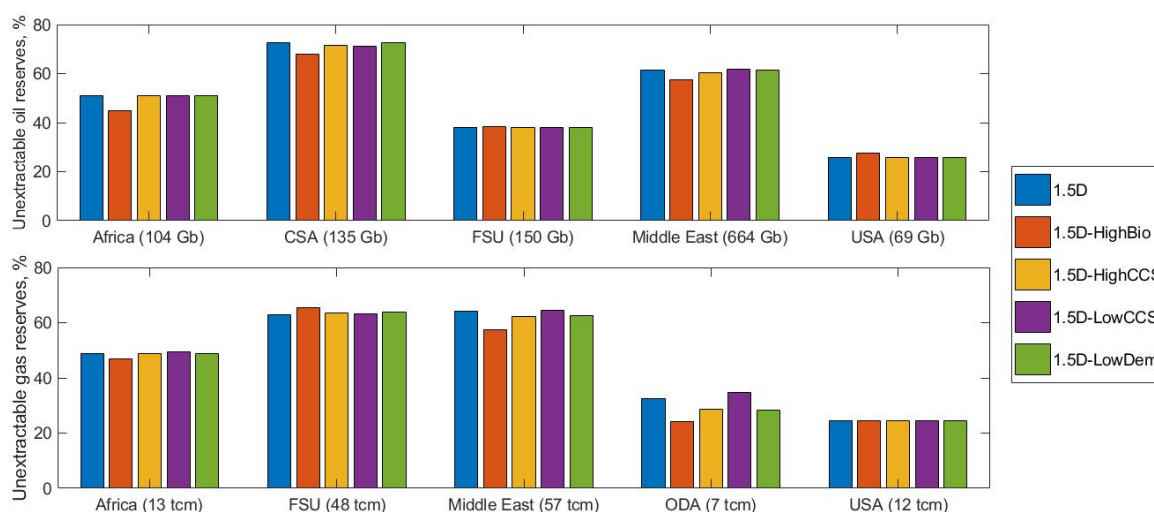

196  
 197 **Supplementary Figure 4. Unextractable reserves by 2050 in largest reserve holders.** Top panel: Unextractable  
 198 oil reserves for major reserve holders with total proved reserves shown on the x-axis; Bottom panel:  
 199 Unextractable fossil methane gas reserves for major reserve holders with total proved reserves shown on the  
 200 x-axis.

201 Our low demand scenario is of interest in that it frees up some of the carbon budget from slowing  
 202 demand growth for energy services from the chemical and aviation sectors and redistributes this  
 203 elsewhere to the transportation sector *in developing countries* (particularly road transport), and  
 204 hence the same unextractable reserve volumes for oil. In short, a saturation of aviation demand in  
 205 OECD countries leaves more room for developing regions to transfer their transportation fleets away  
 206 from oil, whilst remaining consistent with the 1.5°C budget. The altered energy service demand  
 207 pathways for aviation (b) and chemicals (b) in our low demand scenario (assumed an exponential  
 208 growth rate for OECD and non-OECD regions derived from Grubler et al.<sup>6</sup> and extrapolated to 2050  
 209 and 2100) are shown in Supplementary Figure 5 below.

210

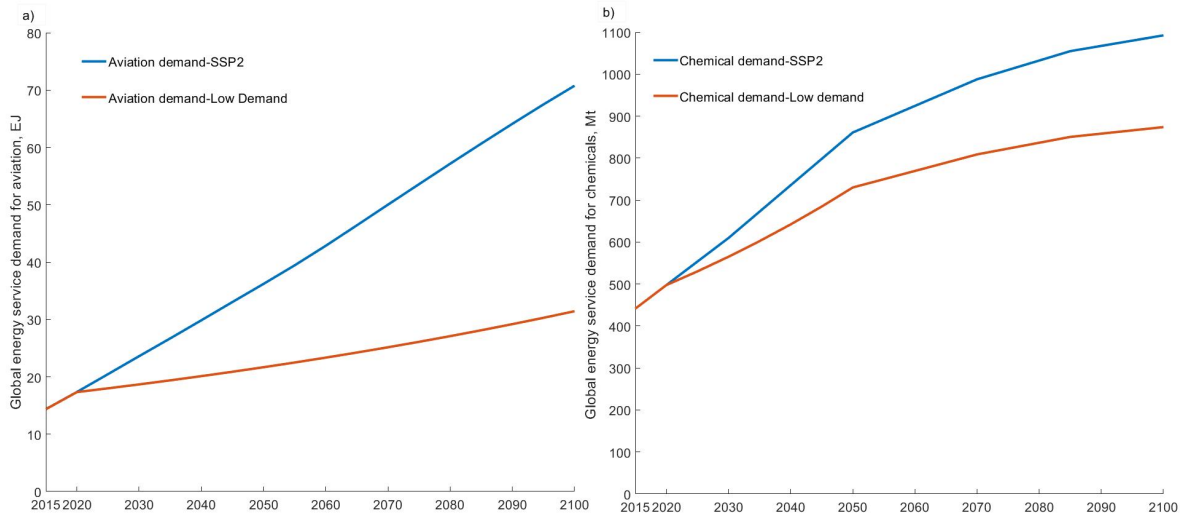

211

212 **Supplementary Figure 5. Low demand scenario (with growth rates derived from Grubler et. al) departing**  
 213 **from baseline SSP2 used in our central 1.5°C scenario for global aviation energy service demand (a) and**  
 214 **global chemical demand (b).** Note energy service demand for aviation in TIAM is input into the model as an  
 215 energy unit rather than the more standard passenger kilometres or vehicle kilometres.

216 **Continued use of fossil fuels post-2050**

217 In our discussion of unextractable fossil fuels under a 1.5°C target, we identified that a significant  
 218 proportion of fossil fuel consumption post-2050 was in the form of feedstock consumption in the  
 219 petrochemical and non-energy industrial sectors. Supplementary Figure 6 below shows total oil (a)  
 220 and fossil methane gas consumption (b) by sector and the percentage of consumption in the form of  
 221 non-combusted feedstocks between 2050 and 2100. Feedstock shares of oil remain relatively static  
 222 (at around 65%) throughout the 2050-2100 time period, with consumption driven by feedstocks in  
 223 the petrochemical sector and non-energy sector (e.g. naphtha in the petrochemical sector and  
 224 asphalt production in the non-energy sector). In contrast, fossil methane gas shows a huge shift from  
 225 combustion-based consumption to feedstocks post-2050.

226 The share of fossil methane gas consumption as a feedstock increases from around 5% in 2050 to  
 227 70% in 2100, peaking at 90% in 2080. The consumption of gas as a feedstock fluctuates between  
 228 2020 and 2050, dropping from around 8% in 2020 to 5% in 2050, before rising again. This is largely  
 229 because in this period, the rapid need to decarbonise leads to lower emission feedstocks being  
 230 consumed in the petrochemical sector, before emissions turn net negative in 2060 and gas is then  
 231 consumed as feedstock (i.e. although crucially it is non-combusted consumption).

232

233

234

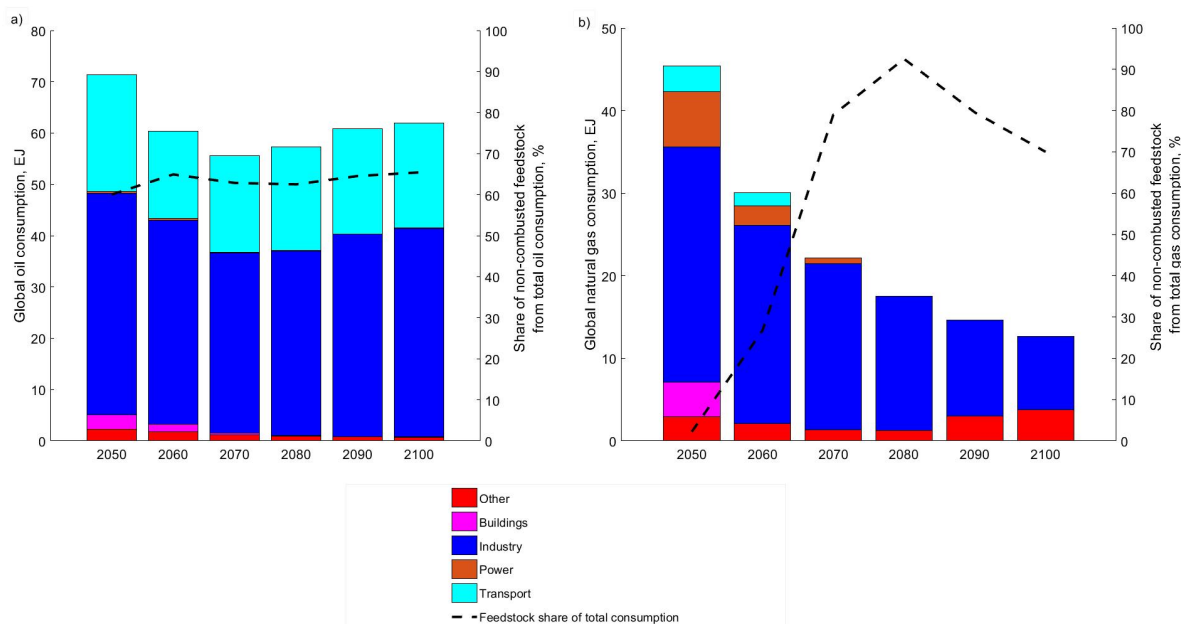

235

236 **Supplementary Figure 6. Oil (a) and gas (b) consumption by sector and percentage of total consumption**  
 237 **from non-combusted feedstocks in our central 1.5°C scenario after 2050**

238 Therefore, as suggested in the main paper, a combination of the development of low carbon  
 239 alternatives to fossil feedstocks, innovation and efficiency improvements to reduce consumption in  
 240 the processes themselves, and demand side initiatives to change consumer behaviour would further  
 241 reduce fossil fuel consumption in these sectors. This is particularly important given the huge  
 242 uncertainty of the roll out of key technologies required in keeping global temperatures to 1.5°C  
 243 including carbon capture utilisation and storage (CCUS), and bioenergy with carbon capture and  
 244 storage (BECCS), particularly given supply chain issues with bioenergy and land competition.

245 It is also important to identify where residual emissions remain in the 1.5°C scenarios in order to  
 246 provide relevant direction for policy-makers to target these sectors and/or regions. Supplementary  
 247 Table 4 shows the proportion of energy system CO<sub>2</sub> emissions from some key sectors across our  
 248 scenarios. Of particular note is the significantly lower share of CO<sub>2</sub> emissions from transport by 2100  
 249 in our lower demand scenario, where energy service demand for aviation in particular reaches a  
 250 saturation point in developed countries; this could be achieved sooner if specific policies are put in  
 251 place to discourage aviation demand.

252 **Supplementary Table 4. Percentage of total CO<sub>2</sub> residual emissions by key sectors across our 1.5°C consistent**  
 253 **scenarios and cumulative CO<sub>2</sub> capture from BECCS.** ‘Other’ sectors include buildings (residential and  
 254 commercial), upstream and the agricultural sectors (including land-use change emissions).

| Scenario   | Cumulative CO <sub>2</sub> capture from BECCS<br>2025-2100, CO <sub>2</sub> | Transport |         | Industry |         | Power   |         | Other   |         |
|------------|-----------------------------------------------------------------------------|-----------|---------|----------|---------|---------|---------|---------|---------|
|            |                                                                             | 2050, %   | 2100, % | 2050, %  | 2100, % | 2050, % | 2100, % | 2050, % | 2100, % |
| 1.5D       | 287                                                                         | 32        | 56      | 40       | 12      | 7       | 10      | 21      | 22      |
| 1.5D-LoCCS | 273                                                                         | 29        | 56      | 42       | 12      | 8       | 10      | 21      | 22      |
| 1.5D-HiCCS | 278                                                                         | 31        | 55      | 38       | 12      | 6       | 10      | 25      | 23      |
| 1.5D-HiBio | 508                                                                         | 39        | 32      | 33       | 8       | 5       | 13      | 23      | 47      |
| 1.5D-LoDem | 282                                                                         | 28        | 38      | 43       | 16      | 6       | 14      | 23      | 32      |

255

256

## 257 SI Section 4. Comparison of TIAM-UCL scenarios versus IAM 1.5°C scenarios

258 In order to put our results in the context of the other estimates of fossil fuel supply in a 1.5°C world,  
259 Supplementary Figure 7 shows global primary fossil energy supply from a range of integrated  
260 assessment models used in the IPCC's Special Report on 1.5 degrees<sup>7</sup>, and the outputs from the 1.5  
261 degree scenarios explored in this work. This provides a significant range of uncertainty across the  
262 modelling horizon.

263 For oil and coal, our scenarios indicate global supply needs to peak now, which has significant  
264 implications for oil and coal producers. For fossil methane gas, supply either declines immediately  
265 ('1.5D', '1.5D-LowCCS') or sees modest growth (0.2-1.1% annually) out to 2030 ('1.5D-HighCCS',  
266 '1.5D-HighBio', '1.5D-LowDem'), before declining. We also see significant sectoral and regional  
267 variations in fossil fuel supply and demand. For example, fossil methane gas demand becomes  
268 increasingly dominated by the industrial sector, with the proportion of fossil methane gas  
269 consumption from power generation and buildings falling constantly from 2020 onwards.  
270 Additionally, there is a significant shift in gas consumption towards regions with (currently) very high  
271 levels of coal consumption, particularly in the industrial sector. For example, China, Other  
272 Developing Asia and India represent ~15% of global gas consumption in 2020, rising to 30-33%  
273 across our scenarios in 2030, and 34-49% by 2050.

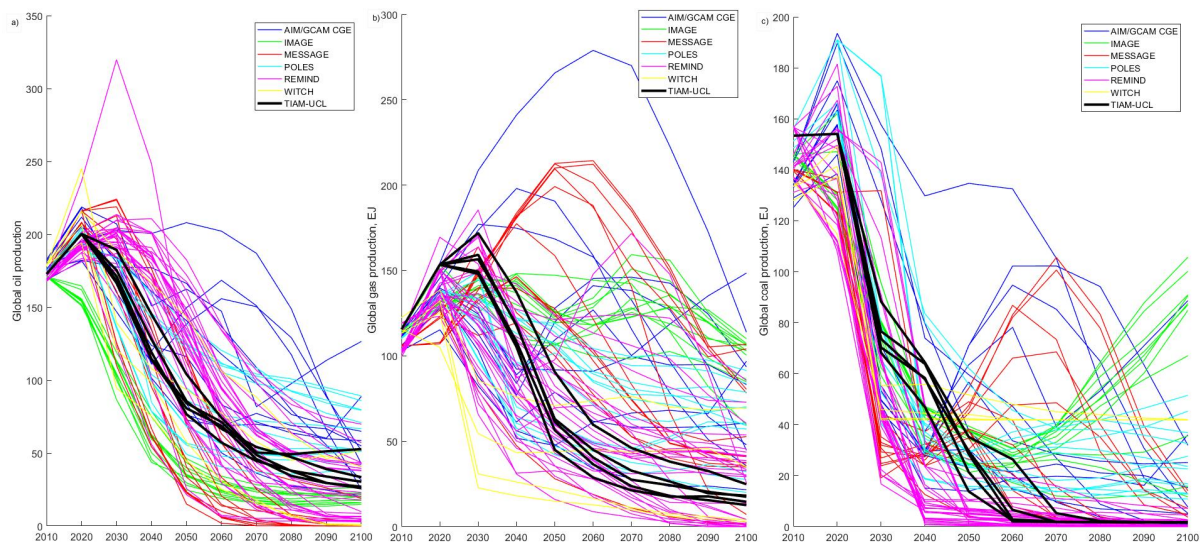

274

275 **Supplementary Figure 7. TIAM-UCL time-series of global fossil fuel production compared against IPCC 1.5°C**  
276 **database (Source of non-study scenarios: Huppmann et al. 2018<sup>7</sup>).** Panel: a) Oil production; b) Fossil methane  
277 gas production; c) Coal production. TIAM-UCL 1.5°C scenarios are the black trend lines.

278 Whilst results are only published out to 2040, we briefly compare cumulative production of each  
279 fossil fuel to the IEA Sustainable Development Scenario (SDS). We find that between 2018 and 2040,  
280 cumulative production of oil, gas and coal in our central 1.5°C scenario are 4% (-21 Gboe), 6% (-5  
281 tcm) and 17% (- 11 Gtce) lower respectively, compare to the IEA SDS<sup>8</sup>.

## 282 SI section 5. Approach to modelling fossil fuels in TIAM-UCL

283 The fossil fuel upstream sector in TIAM-UCL incorporates the availability and costs of primary energy  
284 resources, all extraction processes, and any upgrading / processing required to produce and  
285 distribute energy products for use in end-use sectors. The representation therefore captures the full  
286 system, from getting the resource out of the ground to a form where it can be used in another  
287 downstream sector and / or traded to another region. In this section, we describe the following parts  
288 of the sector representation –

- 289
- 290 • Reserve and resource estimates
- 291 • Fossil resource extraction
- 292 • Primary transformation (upgrading and/or processing)
- 293 • Trade
- 294 • Specific constraints used in the sector

295

296 **Reserve and resource estimates**

297 Given the derivation of unextractable volumes of oil, gas, and coal heavily depends on both the  
 298 availability and cost of different categories of fossil fuels, as well as the overarching climate  
 299 constraints, we describe in detail how our reserve and resource numbers were derived, as well as  
 300 comparing these to publicly available reported volumes.

301 A significant focus of McGlade<sup>9</sup> for oil and gas, and Welsby<sup>10</sup> for gas, was to identify uncertainties in  
 302 the availability of different categories of oil and gas across the McKelvey matrix, and how these  
 303 uncertainties could be quantified and if possible, limited. A large part of this was consistency in  
 304 definitions (which is particularly difficult given transparency is a perennial problem with oil and gas  
 305 reserve reporting). This Section provides both publicly available estimates of oil and gas reserves and  
 306 resources, as well as volumes of different categories of oil and gas derived to consider the inherent  
 307 uncertainty associated with these estimates.

308 We first consider the issues around oil reserve definition, with aggregated 1P global reserve  
 309 estimates from publicly reporting sources and this study shown in Supplementary Table 5. The  
 310 discrepancy between what we have defined as proved reserves and those of the publicly available  
 311 “1P” country-level databases are predominantly driven by reserve revisions of Venezuela (ultra-  
 312 heavy oil), Canada (oil sands) and the Middle East. Rystad Energy stated that the reporting of 1P  
 313 reserves in Venezuela which form the basis of BP Statistical Review (as well as other public reporting  
 314 sources) contain volumes of undiscovered, prospective resources (i.e. undiscovered, ultimately  
 315 recoverable oil)<sup>11,12</sup>. Therefore, these contradict the Society of Petroleum Engineers (SPE) definitions  
 316 (i.e. geologically and economically proven) laid out in our work and we therefore altered those  
 317 volumes of oil classified as reserves in Venezuela.

318 **Supplementary Table 5. Reported volumes of ‘proved’ (or 1P) oil reserves and resources in 2018 from publicly**  
 319 **available sources.** OPEC does not include Canadian oil sands in their proved reserve estimates. Volumes of kerogen oil  
 320 from shale formations have been subtracted from the IEA and BGR recoverable resource estimates. Whilst TIAM-UCL does  
 321 represent kerogen oil, none is produced across any of our scenarios due to its cost and high carbon intensity. Therefore, to  
 322 provide a like-for-like comparison to the resource estimates derived in this work (for example we have not included  
 323 kerogen in our estimates of unextractable resources), estimates of kerogen (shale oil) have been removed.

| Source              | Proved reserves, Gb | Recoverable resources, Gb |
|---------------------|---------------------|---------------------------|
| BP <sup>12</sup>    | 1735                |                           |
| EIA <sup>13</sup>   | 1663                |                           |
| OPEC <sup>14</sup>  | 1498                |                           |
| BGR <sup>15</sup>   | 1790                | 3070                      |
| IEA <sup>8</sup>    | 1700                | 5092                      |
| This study estimate | 1276                | 4094                      |

324

325 The same is also true for Canadian oil sands, where BP continue to distinguish between total  
 326 reserves of oil sands and reserves “under active development”, reflecting the uncertainty in applying  
 327 the term “proved reserves” to oil sands. BP indicates that 21 Gb of Canadian oil sands were under  
 328 active development in 2018. Canadian “proved reserves” jumped from 32 Gb in 2009 to 175 Gb in  
 329 2010, and have stayed roughly around the 170-180 Gb level since 2010 (successive releases of the

330 BP Statistical Review from 2010-2020)<sup>12</sup>. This seems counter-intuitive, particularly given if these are  
 331 in fact 1P figures, i.e. at least 90% of the quoted volume is commercially and technically recoverable,  
 332 then this number would likely have increased (above simply reserve replacement to cover annual  
 333 production) as oil sands development economics have improved significantly over the last decade,  
 334 with cost reductions between 2014 and 2019 estimated between 25-33%<sup>9,16,17</sup>. For the Middle East,  
 335 our reserve numbers are generally below the majority of publicly reporting sources (e.g. IEA, BP,  
 336 OPEC), which in large part can be reconciled with a more detailed exploration of “political reserves”,  
 337 i.e. booking volumes of oil as reserves which in fact do not conform to SPE guidelines but are used to  
 338 convey a political message of resource abundance.<sup>9</sup>

339 An analysis into the uncertainty of recoverable volumes of oil was conducted in detail by McGlade<sup>9</sup>  
 340 and McGlade and Ekins<sup>1</sup>, and we used these uncertainty ranges as guiding principles for this work  
 341 (albeit updating reserves/resource estimates to 2018 to account for movements between different  
 342 resource classifications, as well as cumulative production). Estimates are provided in Supplementary  
 343 Table 6.

344 **Supplementary Table 6. Uncertainty ranges for different categories of oil. The Central estimates were used in**  
 345 **this work for volumes of reserves and resources.** Some volumes of tight oil, gas liquids and EHOB are included in the  
 346 proved reserve category. The total volume of proven reserves assumed in this work is 1276 Gb, with the regional  
 347 distribution shown in Supplementary Table 10. Data is adapted from IEA<sup>8</sup>, BGR<sup>15</sup>, McGlade and Ekins<sup>1</sup>, BP<sup>12</sup>, and Gautier  
 348 and Moore<sup>18</sup>.

| Category                                                               | Low estimate (Gboe) | Central estimate (Gboe) | High estimate (Gboe) |
|------------------------------------------------------------------------|---------------------|-------------------------|----------------------|
| Proved conventional reserves                                           | 845                 | 1045                    | 1156                 |
| Reserve additions                                                      | 336                 | 576                     | 926                  |
| New discoveries                                                        | 126                 | 246                     | 526                  |
| Tight oil (technically recoverable resources)                          | 286                 | 436                     | 823                  |
| Extra heavy oil and bitumen (EHOB) (technically recoverable resources) | 830                 | 1518                    | 1870                 |
| Arctic                                                                 | 40                  | 66                      | 80                   |
| Gas liquids                                                            | 134                 | 210                     | 585                  |
| Total recoverable resources                                            | 2597                | 4094                    | 5966                 |

349  
350

351 For gas, a more recent bottom-up assessment of country-level reserves was conducted by Welsby<sup>10</sup>,  
 352 using a field-level database initially available from NETL<sup>19</sup> and significantly expanded. Ranges of  
 353 country-level conventional non-associated proved gas reserves were applied individual probability  
 354 distributions and combined into aggregated regional distributions. In general (although not  
 355 exclusively), the summation of field reserves from the database provided the lower bound input into  
 356 each country’s distribution and amended 1P data from Cedigaz provided the upper bound. The  
 357 analysis at a field-level allowed for a more robust application of the SPE guidelines for 1P reserves.  
 358 For example, from 2015 onwards, Cedigaz and the Oil and Gas Journal have quoted Russian 1P gas  
 359 reserves at around 50 tcm. However, this figure appears to have been derived from Russian  
 360 government estimates which use “geological reserves”, rather than any consideration of project  
 361 economics. In the Energy Review undertaken by the Government of the Russian Federation<sup>20</sup>,  
 362 Russian “proved reserves” include fields such as Shtokman where field development has consistently  
 363 been shelved due to extremely high development costs. Therefore, the quoting of 2018 Russian  
 364 proved (1P) reserves of 48-51 tcm by Cedigaz and the Oil and Gas Journal strongly suggests these  
 365 refer instead to those quoted by the Russian government using their own (“ABC1”) reserve reporting

standards, which includes both producing fields, undeveloped fields, contingent reservoirs in producing fields (i.e. reserves, reserve additions, and undiscovered volumes)<sup>21</sup>. For reference, BP quoted 1P Russian gas reserves in 2018 at 38 tcm<sup>12</sup>. These dynamics were reviewed for gas by Welsby<sup>10</sup> with all reserves estimated to a base year of 2018 for this work. A similar bottom-up analysis was used to quantify uncertainty in technically recoverable resources of unconventional gas, including shale gas at a play level. As with all estimates of reserves and resources, huge uncertainty surrounds these estimates, and the application of individual country distributions and aggregation into the regions of TIAM-UCL was deemed the best way to account for such uncertainty. Supplementary Table 7 shows publicly reported global 1P gas reserves from a range of reporting sources as well as the 1P estimate of global fossil methane gas reserves estimated in this work.

**Supplementary Table 7. Estimates of global 1P gas reserves in 2018 from publicly available sources**

| Source                | Proved reserves, tcm |
|-----------------------|----------------------|
| BGR <sup>15</sup>     | 198                  |
| BP <sup>12</sup>      | 197                  |
| IEA <sup>8</sup>      | 225                  |
| Cedigaz <sup>21</sup> | 198                  |
| OGJ <sup>21</sup>     | 198                  |
| EIA <sup>22</sup>     | 193                  |
| OPEC <sup>14</sup>    | 203                  |
| This study estimate   | 155                  |

Examples of the range of uncertainty for each category of gas generated by Welsby<sup>10</sup> from a range of sources is provided in Supplementary Table 8. As discussed above for oil, the uncertainties around recoverable fossil methane gas resources are often even larger than for reserves, given the relative lack of development of many of these resources and/or lack of technological maturation in certain regions. The method to account for this uncertainty is covered in more detail later in this section, including graphical representations in Supplementary Figure 12 for uncertainty in technically recoverable shale gas resources in the Central and South America region in TIAM-UCL.

**Supplementary Table 8. Uncertainty ranges for different categories of gas. The Central estimates were used in this work for volumes of reserves and resources.** The low, central and high estimates refer to the 95<sup>th</sup>, 50<sup>th</sup> (i.e. median), and 5<sup>th</sup> percentile outputs from the relevant regional distributions used to explore uncertainty. Ranges have been adapted from Welsby<sup>10</sup>, with data sources including IEA<sup>8,23</sup>, NETL<sup>19</sup>, BP<sup>12</sup>, Attanasi and Freeman<sup>24</sup>, Klett et. al<sup>25</sup>, Brownfield et. al<sup>26</sup>, EIA<sup>27,28</sup>, Medlock<sup>29</sup>, BGR<sup>15</sup>, Wang et. al<sup>30</sup>, McGlade and Ekins<sup>1</sup>, Gautier and Moore<sup>18</sup>, and APEC<sup>31</sup>.

| Category                                  | Low estimate (tcm) | Central estimate (tcm) | High estimate (tcm) |
|-------------------------------------------|--------------------|------------------------|---------------------|
| Proved reserves                           | 115                | 155                    | 176                 |
| Reserve additions                         | 75                 | 100                    | 155                 |
| New discoveries                           | 68                 | 119                    | 187                 |
| Shale (technically recoverable resources) | 145                | 198                    | 225                 |
| Tight (technically recoverable resources) | 53                 | 72                     | 91                  |
| CBM (technically recoverable resources)   | 42                 | 47                     | 49                  |
| Arctic                                    | 15                 | 29                     | 37                  |
| Total                                     | 513                | 720                    | 881                 |

390

391 Given its carbon intensity, coal is rapidly phased-out of the energy system across our 1.5°C scenarios.  
 392 Whilst less attention was given to uncertainty ranges for coal compared to oil and gas, we have  
 393 nevertheless ensured that our reserve estimates lie broadly within the ranges given by the BGR<sup>15</sup>.  
 394 Whilst our proved coal reserves are ~ 13% lower than the BGR, this can be partially explained by the  
 395 conversion of these numbers to Gtce (i.e. energy content billion tons of coal, equivalent), with lignite  
 396 (brown coal) and hard coal (anthracite and bituminous) having significantly different energy  
 397 contents. Therefore, our coal reserves are lower than the BGR (2019) suggests on a metric ton basis,  
 398 however given these “proved reserve” figures are open to significant uncertainty, and the  
 399 aforementioned use of Gtce distinguishing between hard and soft coals, these numbers can be  
 400 reconciled. Additionally, the regional breakdown of reserves shows similar levels in key coal  
 401 producing/consuming regions. For example, combined hard coal reserves in India and China are 222  
 402 Gtce according to the BGR (2019), with our estimates suggesting 226 Gtce.

403 **Supplementary Table 9. Estimates of global coal reserves in 2018 from publicly available sources**

| Source            | Unit | Proved reserves |
|-------------------|------|-----------------|
| BGR <sup>15</sup> | Gt   | 1070            |
| BP <sup>12</sup>  | Gt   | 1070            |
| IEA <sup>8</sup>  | Gt   | 1043            |
| EIA <sup>32</sup> | Gt   | 1048            |
| This study        | Gtce | 931             |

404

405 **Regional distribution of reserves and resources**

406 Supplementary Table 10 shows the regional distribution of reserves and resources for oil, gas and coal.  
 407 These were taken from the above discussion of reserves and resource estimates in TIAM-UCL, with  
 408 uncertainty ranges shown in Supplementary Table 6 and 8.

409

410 **Supplementary Table 10. Regional distribution of reserves and resources based on central estimates**

| Region                    | Oil, Gboe    |              | Gas, Tcm   |            | Coal, Gtce |             |
|---------------------------|--------------|--------------|------------|------------|------------|-------------|
|                           | Reserves     | Resources    | Reserves   | Resources  | Reserves   | Resources   |
| Africa                    | 104          | 276          | 13         | 77         | 31         | 46          |
| Canada                    | 52           | 756          | 2          | 33         | 5          | 71          |
| China and India           | 35           | 88           | 5          | 69         | 242        | 1174        |
| Former Soviet Union       | 150          | 632          | 48         | 158        | 212        | 1094        |
| Central and South America | 135          | 741          | 5          | 75         | 13         | 34          |
| Europe                    | 16           | 89           | 4          | 37         | 76         | 221         |
| Middle East               | 664          | 1,015        | 57         | 108        | 5          | 13          |
| OECD Pacific              | 4            | 31           | 2          | 38         | 84         | 312         |
| Other Developing Asia     | 22           | 51           | 7          | 36         | 24         | 226         |
| USA                       | 69           | 327          | 11         | 82         | 239        | 873         |
| <b>Global</b>             | <b>1,276</b> | <b>4,094</b> | <b>155</b> | <b>720</b> | <b>931</b> | <b>4066</b> |

411



412

413 **Fossil resource extraction**

414 Primary extraction in TIAM-UCL is represented by a range of ‘mining’ processes, with the costs  
415 reflecting a range of factors including:

- 416 • Technology maturity (e.g. if a technology has been developed over time in a certain region,  
417 and experience has been accrued (learning-by-doing), then the technology can be relatively  
418 mature and potential cost reductions/efficiency gains can be experienced. For example,  
419 shale gas drilling experience was accrued over decades in the United States, both through  
420 learning-by-doing (e.g. multiple wells per drilling pad) and fiscal incentives (tax breaks) which  
421 reduced costs, and therefore US shale gas costs are lower than other regions.
- 422 • Technical difficulty (generally driven by the geology of the formation in question, i.e. the  
423 source rock). Higher mining costs are incurred for fossil resources which require additional  
424 stimulation to lead to economic flow rates, such as hydraulic fracturing for tight reservoirs of  
425 oil/gas
- 426 • Production flow rates linked to the above technical difficulty. Additionally, various source  
427 rocks yield different production flow dynamics, e.g. across the lifetime of a well, production  
428 characteristics for conventional and unconventional gas vary. Conventional non-associated  
429 fossil methane gas would generally exhibit slower growth rates up to peak production, a  
430 longer production plateau period, and slower rates of production decline. Unconventional  
431 shale gas wells would generally exhibit rapid production growth up to a maximum, a shorter  
432 plateau vis-à-vis conventional gas, and faster decline rates.

433 Coal

434 Primary coal resources in TIAM-UCL are split into two categories, utilizing data collected by Remme  
435 et. al.<sup>33</sup> -

- 436 • Brown coal (lignite): lower energy content, with average heating value ranging from 5.57-17  
437 MJ/kg
- 438 • Hard coal (sub-bituminous, bituminous and anthracite): higher energy content, with average  
439 heating value ranging from 17.58-27.55 MJ/kg

440

441 As with oil and fossil methane gas, the extraction technologies for coal split the resource base into  
442 cost tranches, in order to reflect (albeit simplistically), cost depletion dynamics. In short, as the more  
443 accessible and higher quality resources are depleted, the model must move to more expensive  
444 extraction of (potentially) harder to exploit resources. Coal is split into hard coal and brown coal,  
445 with the representative mining technologies for both categories split into three cost categories. The  
446 distribution of resources/reserves assigned to each cost category varies by region, and is influenced  
447 by the proportion of the total resource base which can be considered reserves, with the remainder  
448 of resources split between the middle and highest cost categories.

449

450 Supplementary Figure 8 shows a cost depletion curve for global coal resources, and the  
451 corresponding global supply cost curve constructed from the cost depletion curve. Additionally,  
452 Supplementary Figure 9 shows a global supply cost curve broken down into the regions of TIAM-UCL.

453

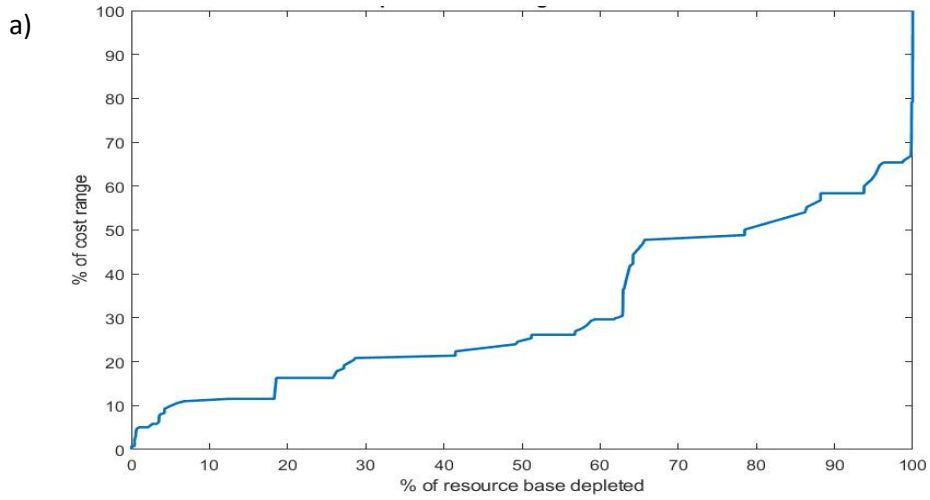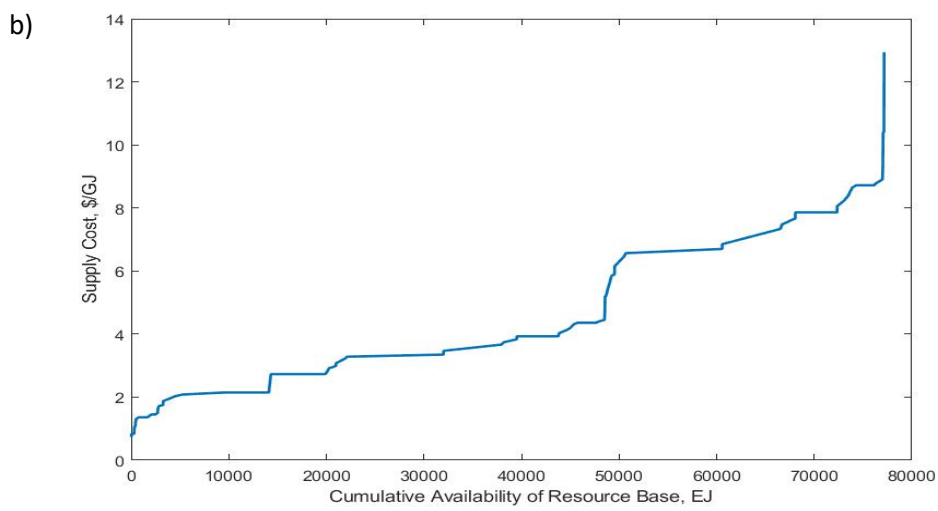

454 **Supplementary Figure 8. a) Cost depletion curve derived from TIAM-UCL resources and costs for global coal;**  
 455 **b) supply cost curve derived from the cost depletion curve.** Source data are provided as a Source Data file.

456  
 457

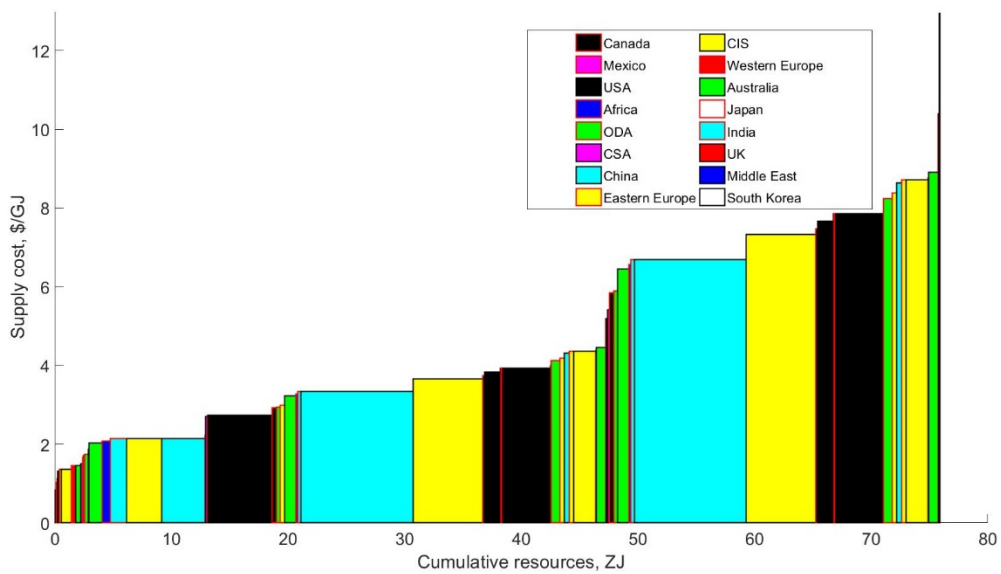

458

459 **Supplementary Figure 9. Global supply cost curve for coal disaggregated into TIAM-UCL regions.** Source data  
460 are provided as a Source Data file.

461

462 Fossil methane gas

463 The underlying availability and cost of fossil methane gas in TIAM-UCL is disaggregated into the  
464 following geological categories:

- 465 • Non-associated conventional gas proved reserves
- 466 • Non-associated conventional gas reserve additions
- 467 • Non-associated conventional gas new discoveries
- 468 • Associated fossil methane gas
- 469 • Arctic conventional fossil methane gas resources
- 470 • Shale gas
- 471 • Coal bed methane
- 472 • Tight fossil methane gas

473

474 As with oil, the disaggregation of fossil methane gas in TIAM-UCL is based on McGlade<sup>9</sup>. This analysis  
475 has been extended in a forthcoming thesis by Welsby<sup>10</sup>, with field-level assessments of resource  
476 availabilities and costs. On a regional level, supply cost curves are constructed using an approach  
477 developed in Welsby<sup>10</sup>. Resource assessments were generally conducted at disaggregated field-  
478 /play-level, and then aggregated into the regions of TIAM-UCL using probability distributions, and  
479 taking into account any correlation between discrete estimates etc. These were then applied to  
480 depletion curves which were formed from a database of field-/play-level costs where possible. The  
481 database was extended to fields for which costs were either not known (i.e. no publicly available  
482 indication of field supply costs) or have not yet been developed.

483

484 The field database was available from NETL<sup>19</sup>, and significantly extended and improved by Welsby,  
485 including adding additional geological information such as water depths, reservoir depths (where  
486 missing), and concentrations of hydrogen sulphide / CO<sub>2</sub>. This includes undiscovered fossil methane  
487 gas in TIAM-UCL by applying the field costs derived for potential reserve additions and adding an  
488 exploration cost. The application of supply costs to the individual gas fields was done via a linear  
489 regression model. A database of field costs was developed by Welsby<sup>10</sup> and a linear regression model  
490 fitted to a range of parameters in order to identify statistically significant drivers of field  
491 development costs. For conventional fossil methane gas, these include reservoir depth, the presence  
492 of hydrogen sulphide and CO<sub>2</sub>, water depths, the size of the field, and a binary risk variable. For  
493 unconventional fossil methane gas, statistically significant field cost drivers included reservoir  
494 depths, accumulated drilling experience, the range of lateral lengths for horizontal drilling, and the  
495 thickness of the source rock. This means the representation of fossil methane gas supply costs in  
496 TIAM-UCL is driven by statistically significant coefficients of field-/play-level supply costs, aggregated  
497 into a representative cost depletion curves.

498

499 Supplementary Figure 10 shows an example cost depletion curve for conventional non-associated  
500 fossil methane gas reserves (taken from Welsby<sup>10</sup>). Aggregated regional supply cost curves  
501 (Supplementary Figure 11) were derived from field-/play-level cost depletion curves shown in  
502 Supplementary Figure 10 and have been aggregated into the TIAM-UCL regions. The three-step cost  
503 curves in TIAM-UCL mean that costs for each regions are aggregated from field-level data into  
504 weighted average costs for each cost step.

505

506 a)

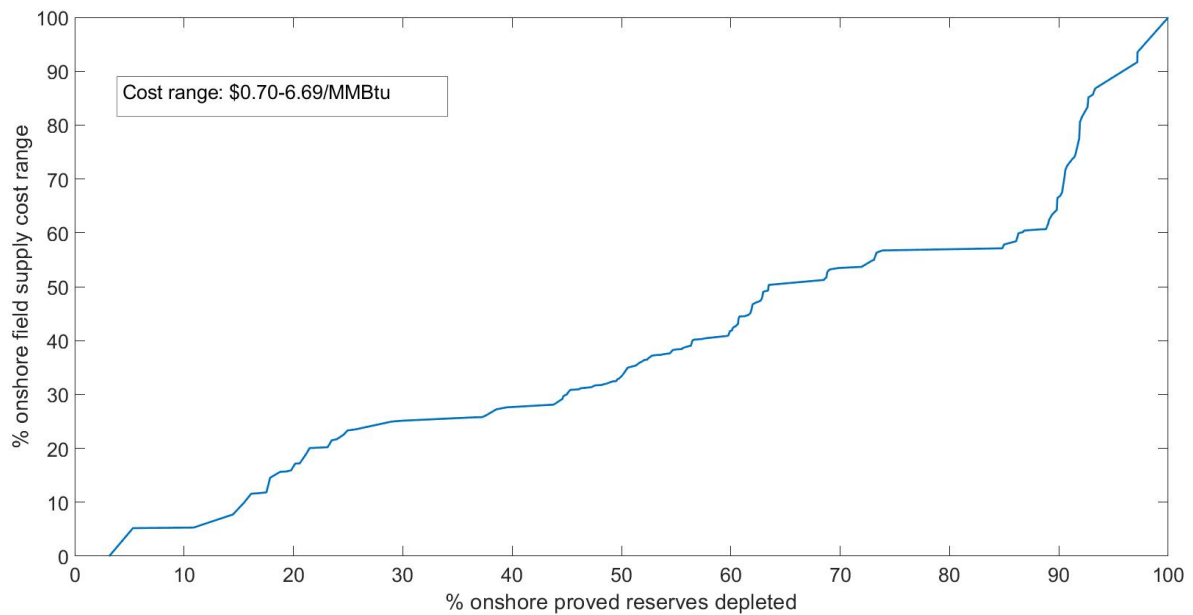

507  
508  
509

b)

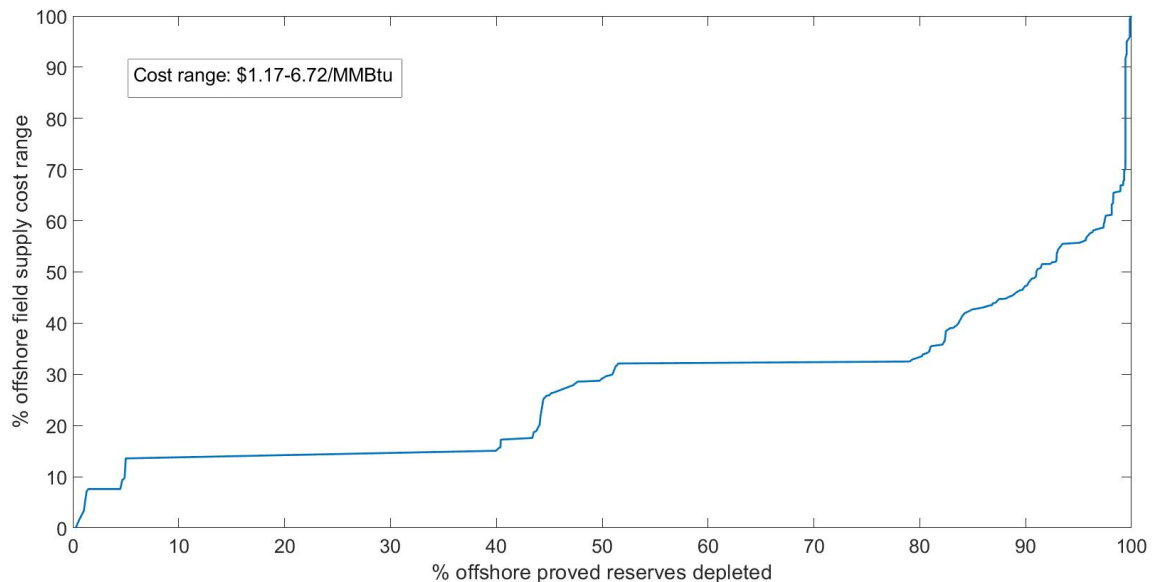

510

511 **Supplementary Figure 10. Example cost depletion curve constructed by Welsby<sup>10</sup> for proved onshore (a) and**  
512 **offshore (b) non-associated gas reserves.** Source data are provided as a Source Data file. Source: Welsby, 2021<sup>10</sup>

513

514 Additionally, Supplementary Figure 11 shows a) the regional breakdown of the resource distribution,  
515 and b) the supply cost with each resource category identified. For reference, none of the figures in  
516 this section include associated fossil methane gas resources in the supply cost curves, as these are  
517 calculated separately, with resource availabilities calculated by McGlade<sup>9</sup> and Welsby<sup>10</sup>. Additionally,  
518 improvements made by Welsby<sup>10</sup> include an endogenous decision within the model of whether to  
519 produce the gas (which requires investment in new capacity if existing capacity is insufficient) or  
520 flare/vent it.

521

a)

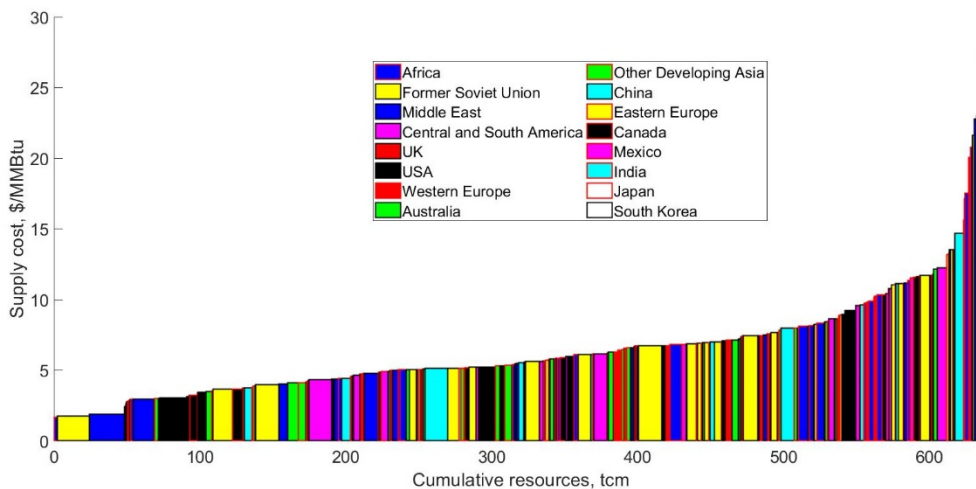

b)

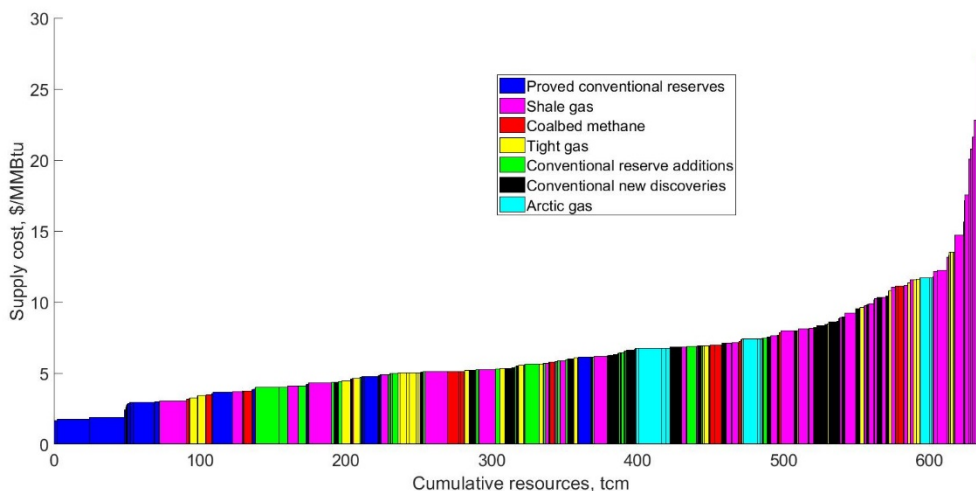

523 **Supplementary Figure 11. Global gas supply cost curve from 2015 by a) region b) resource category.** Source  
 524 data are provided as a Source Data file. Source: Welsby, 2021<sup>10</sup>, McGlade, 2013<sup>9</sup>

525 Supplementary Figure 12a shows the aggregated output distribution for combining play-level  
 526 estimates of shale gas for the Central and South America region in TIAM-UCL, while Supplementary  
 527 Figure 12b shows the depletion analysis using US shale play cost analogues and linear regression  
 528 using the geological characteristics of individual plays in South America (e.g. shale reservoir depth,  
 529 thickness, etc.). These are then combined to form a range of supply cost curves, shown in  
 530 Supplementary Figure 12c.

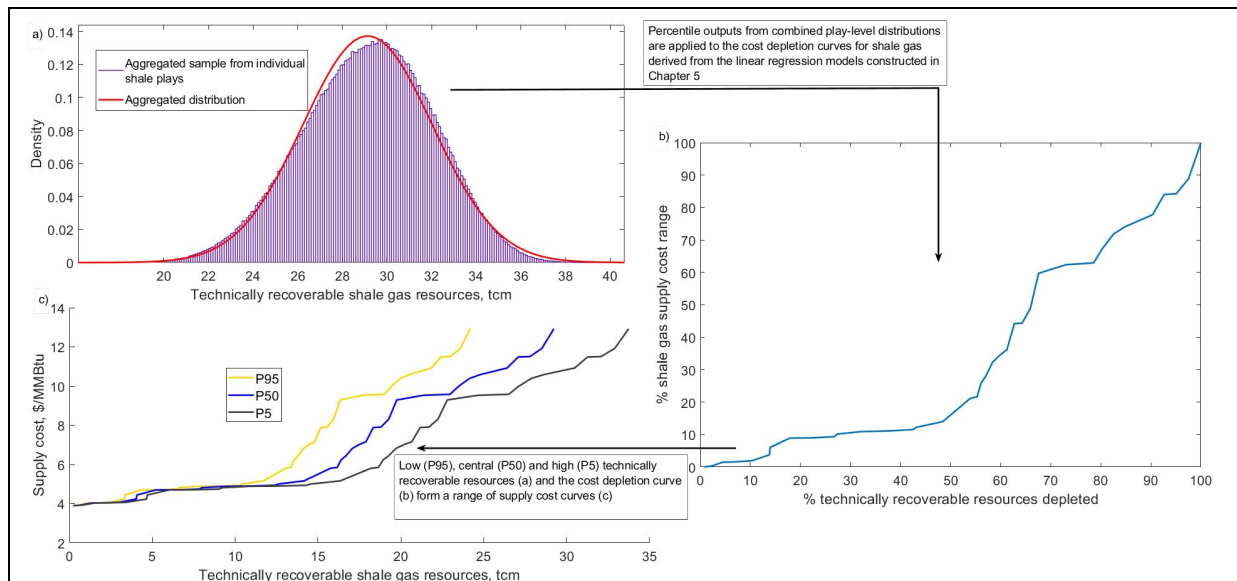

531

532 **Supplementary Figure 12. a) Aggregated distribution for estimates of technically recoverable resources of**  
 533 **shale gas in individual plays in Central and South America (CSA) region in TIAM-UCL; b) Cost depletion curve**  
 534 **for shale gas in Central and South America, and c) central supply cost curve for technically recoverable**  
 535 **resources of shale gas for Central and South America (CSA).** Source data are provided as a Source Data file.  
 536 Source: Welsby, 2021<sup>10</sup>. Play-level technically recoverable resource distribution inputs adapted from IEA<sup>8,23</sup>,  
 537 EIA<sup>34</sup>, and Medlock<sup>29</sup>.

538 Primary extraction of fossil methane gas is split by region and into the different geological  
 539 categories mentioned previously. For each category, the supply cost curves shown above are then  
 540 disaggregated into a three-step supply cost curve, with the first 50% of the resource base in the  
 541 lowest cost bracket, then the next 30% in the middle cost category, and finally the last 20% in the  
 542 highest cost category. The use of a 50-30-20% split was used by McGlade<sup>9</sup> and could be considered  
 543 somewhat arbitrary. However, in the example shown in Supplementary Figure 13, it can be seen that  
 544 the distribution of field costs generally follow the pattern that a significant proportion of the reserve  
 545 base is available at the lower end of the cost range, whilst high cost reserves make up less of the  
 546 reserve base.

547 Supplementary Figure 13 is taken from the work conducted on field-level analysis of the drivers of  
 548 fossil methane gas supply costs undertaken by Welsby<sup>10</sup>. The supply cost curve in Figure 13  
 549 represents the median output from the combined distribution of uncertainty in proved (1P) non-  
 550 associated fossil methane gas reserves for Middle East OPEC countries, with the median estimate  
 551 of 1P non-associated gas reserves from Welsby<sup>10</sup> ~ 46 Tcm. Additionally, the blue lines shows the  
 552 low, middle and high cost ranges, and the corresponding quantity of proved non-associated gas  
 553 reserves which can be extracted at each aggregated cost step. For reference, the higher end of the  
 554 cost range for the Middle East OPEC region would be sour gas deposits in the UAE and Saudi Arabia,  
 555 some of which lie at significant reservoir depths but have been developed to limit import  
 556 dependency (e.g. Shah sour gas field in the UAE).

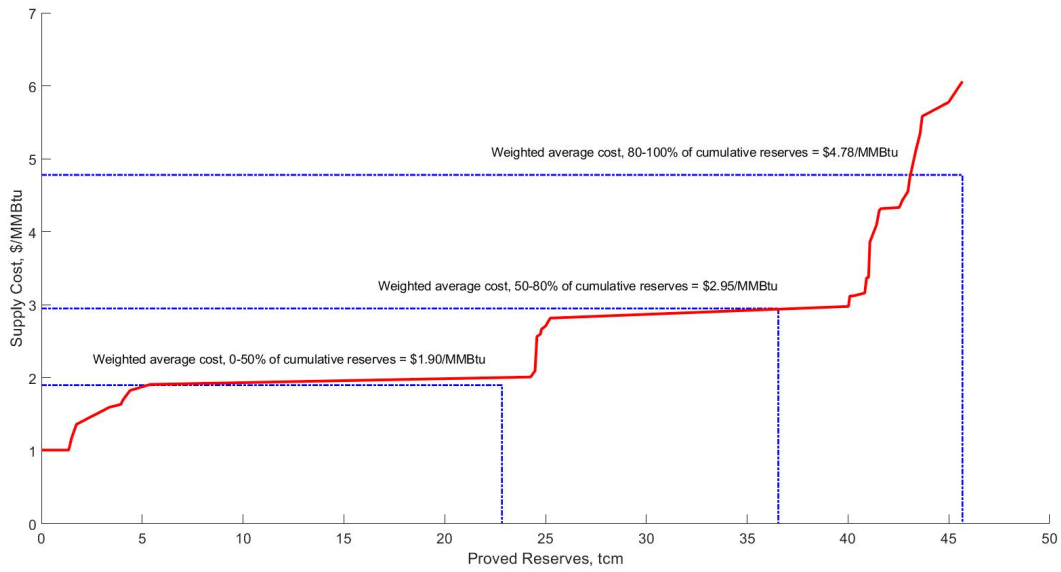

557

558

559 **Supplementary Figure 13. a) Example of three-step supply cost curve for the Middle East OPEC region in**  
 560 **TIAM-UCL, for proved non-associated conventional gas reserves. The curve represents the median (P50)**  
 561 **estimate from the aggregated regional distribution of non-associated proved gas reserves.** Source data are  
 562 provided as a Source Data file. Source: Welsby, 2021<sup>10</sup>

563 Supplementary Table 11 shows a cost range for some key fossil methane gas mining technologies,  
 564 generated using a field-level database and a linear regression model applied to geological  
 565 parameters to generate cost depletion curves<sup>10</sup>.

566

567 **Supplementary Table 11. Cost range for individual fossil methane gas fields derived from the regression**  
 568 **analysis by Welsby<sup>10</sup>, and used to construct supply cost curves which were into TIAM-UCL**

569

| Resource category                                                   | Minimum cost, \$/boe | Minimum cost region       | Maximum cost, \$/boe* | Maximum cost region       |
|---------------------------------------------------------------------|----------------------|---------------------------|-----------------------|---------------------------|
| Proved non-associated onshore conventional reserves (includes sour) | 4                    | FSU                       | 38                    | FSU                       |
| Proved non-associated offshore shallow conventional reserves        | 7                    | Middle East               | 37                    | Europe                    |
| Proved non-associated offshore deep conventional reserves           | 16                   | Central and South America | 38                    | USA                       |
| Conventional non-associated reserve additions                       | 10                   | FSU                       | 45                    | Middle East               |
| Undiscovered non-associated conventional                            | 24                   | Middle East               | 58                    | Central and South America |
| Sour fossil methane gas undeveloped                                 | 29                   | FSU                       | 45                    | MEA_P                     |
| Arctic (undeveloped)                                                | 36                   | -                         | 63                    | -                         |
| Shale gas                                                           | 14                   | USA                       | 147                   | MEA_P                     |
| Tight fossil methane gas                                            | 18                   | USA/CAN                   | 66                    | Europe                    |
| CBM                                                                 | 17                   | USA                       | 60                    | China, FSU                |

570 \* Fossil methane gas costs here have been expressed in \$/boe so they can be directly compared to the oil extraction costs in Table 1.3. Data  
 571 from Welsby, 2021<sup>10</sup>, McGlade, 2013<sup>9</sup>.

572  
 573

574 Oil

575 The representation of oil in TIAM-UCL is predominantly based on the work by McGlade<sup>9</sup>, which  
 576 focused on quantifying uncertainties in the outlook for oil and fossil methane gas, and in particular  
 577 their availability and costs. As with fossil methane gas, oil is split into different geological categories,  
 578 each with specific availabilities and supply cost dynamics:

- 579 • Conventional oil proved reserves
- 580 • Conventional oil reserve additions
- 581 • Conventional oil new discoveries
- 582 • Arctic oil
- 583 • Mined shale oil
- 584 • In-situ shale oil
- 585 • Light tight oil
- 586 • Mined oil sands
- 587 • In-situ oil sands (ultra-heavy oil)

588

589 The representation of uncertainty in TIAM-UCL for oil availability and costs differs between  
 590 conventional and unconventional oil. For conventional oil, adapted country-level estimates of  
 591 reserve and/or resource availability were taken from the literature and input into probability  
 592 distributions, with corresponding assumptions on correlation between the estimates. For  
 593 unconventional oil (e.g. mined bitumen), two parameters were assigned probability distributions: a  
 594 range of estimates for original oil in-place (OOIP) and a range of estimates of a recovery factor (i.e.  
 595 between 0 and 1, which determines the proportion of the in-place resource base which is technically  
 596 recoverable). These two distributions were then combined using random repeated sampling (Monte  
 597 Carlo simulations) to form regional estimates. The combination is the product of the OOIP and the  
 598 recovery factor, repeated a large number of times to generate an aggregated distribution. These



599 estimates of the resource base for each category of oil were then combined with cost depletion  
600 curves, mostly formed from IEA data on cost ranges, and used to generate supply cost curves. For  
601 reference, a detailed discussion around the construction of cost depletion and supply cost curves  
602 taking into account the inherent uncertainty in volumetric and cost estimates across different  
603 regions and oil resource categories can be found in McGlade<sup>9</sup>. In general, the depletion analysis for  
604 unconventional oil exhibits significantly more rapid cost escalation (compared to conventional oil) as  
605 the resource base is depleted.

606

607 The mining processes for oil and fossil methane gas match the geological categories listed  
608 previously. Unconventional oil (tar sands and oil shale) has several more steps in the model to reflect  
609 the upgrading required to generate a barrel of crude oil (i.e. to get from bitumen/kerogen, to a  
610 barrel of synthetic crude oil). Supplementary Table 12 shows the range of costs in TIAM-UCL for the  
611 mining technologies in the upstream sector. Also included is the region in TIAM-UCL containing the  
612 minimum and maximum cost for each category. As with fossil methane gas represented in  
613 Supplementary Figure 13, the supply cost curves for each category of oil are split into three sections:  
614 the first 50% of the resource base considered the lowest cost, then the next 30%, and finally the  
615 most expensive oil representing the last 20% of the resource base.

616 **Supplementary Table 12. Cost ranges for oil resources in TIAM-UCL (McGlade, 2013<sup>9</sup>)**

617

| Resource category | Minimum cost, \$/boe | Minimum cost region       | Maximum cost, \$/boe | Maximum cost region       |
|-------------------|----------------------|---------------------------|----------------------|---------------------------|
| Proved reserves   | 11                   | MEA_OPEC                  | 47                   | CSA_N                     |
| Reserve addition  | 21                   | MEA_OPEC                  | 68                   | CSA_N                     |
| New discoveries   | 16                   | MEA_OPEC                  | 94                   | IND                       |
| Light tight oil   | 30                   | USA                       | 68                   | Outside North America     |
| Arctic            | 46                   | -                         | 97                   | -                         |
| Bitumen (mining)  | 51                   | Canada                    | 89                   | Central and South America |
| Bitumen (in-situ) | 43                   | Canada                    | 88                   | Central and South America |
| Ultra-heavy oil   | 43                   | Central and South America | 75                   | Central and South America |
| Oil shale         | 54                   | Europe                    | 124                  | Middle East               |

618 \* Sourced from McGlade, 2013<sup>9</sup> with light tight oil updated by Welsby, 2021<sup>10</sup>

619

620 Due to limited development outside of certain countries (e.g. Canada for bitumen production), costs  
621 have largely been applied homogenously across the relevant TIAM regions. Supplementary Figure 14  
622 shows the global supply cost curve for oil in TIAM-UCL split by region (a) and resource category (b). It  
623 should also be noted that unconventional oil is split into three separate cost categories: variable  
624 O&M, fixed O&M, and an investment cost (i.e. capital cost). In order to incorporate these into a  
625 supply cost curve with conventional oil, a singular supply cost figure was required, therefore the  
626 O&M costs were summed, and then a per-unit investment cost was assigned to each category of  
627 unconventional oil (derived by dividing cumulative investment and cumulative production from each  
628 mining technology) which then yielded a supply cost figure.

a)

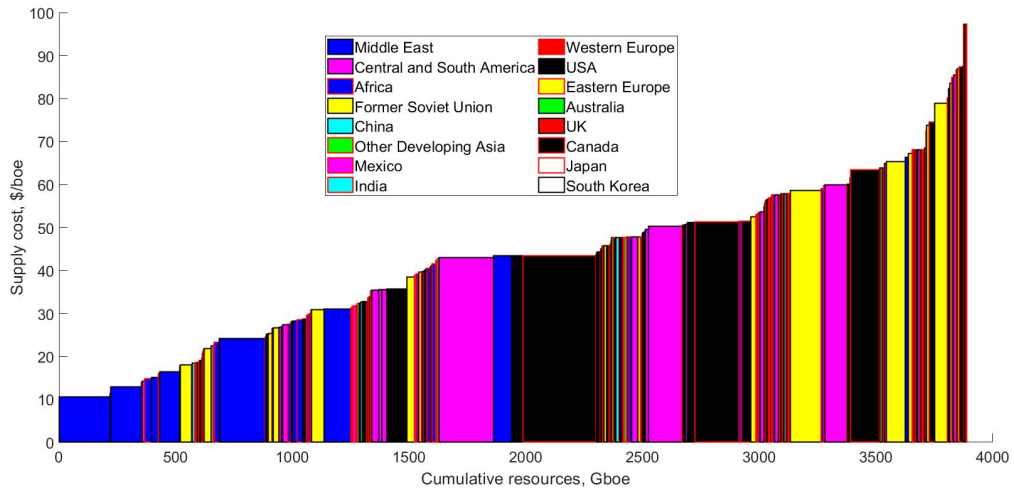

b)

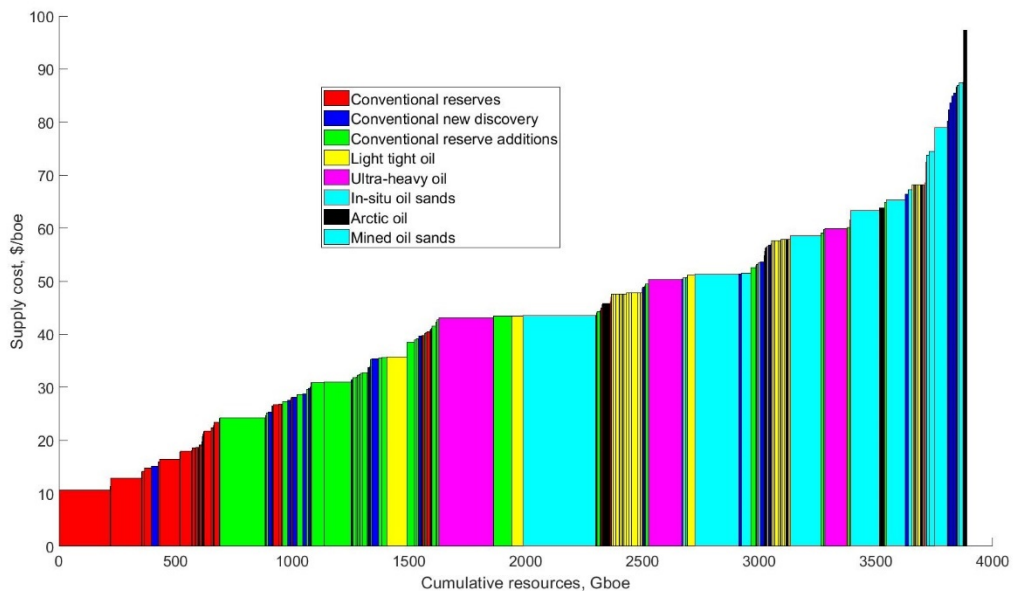

629 **Supplementary Figure 14. Global supply cost curve for oil from 2015 by a) TIAM-UCL region and b) oil**  
 630 **resource category.** Source data are provided as a Source Data file.

631

632 **Primary transformation (upgrading and/or processing)**

633

634 In addition to differentiating primary energy resources, TIAM-UCL also accounts for the further  
 635 upgrading and processing of energy commodities (e.g. heat inputs required for the production of  
 636 crude oil from the oil sands mining process).

637 Coal

638 Coal requires far less upstream upgrading/processing than oil and gas. In general any impurities will  
 639 result in lower energy content in its end-use, rather than being removed in the upstream as with oil  
 640 and gas. One main exception is the production of coking coal from hard coal, which requires energy  
 641 inputs and therefore incurs costs, losses, and emissions across the upstream sector. Coking coal,  
 642 used predominantly in the production of iron and steel is represented in TIAM-UCL as a product of  
 643 heating hard coal at very high temperatures ( $\geq 1000^{\circ}\text{C}$ ), leaving very high concentrations of carbon<sup>35</sup>.

644 Fossil methane gas

645 Fossil methane gas requires processing to ensure it is of pipeline / liquefaction quality. This involves  
 646 removing any impurities which could undermine the integrity of transportation / further  
 647 transformation infrastructure, such as hydrogen sulphide (H<sub>2</sub>S) and carbon dioxide (CO<sub>2</sub>) corroding  
 648 gas pipelines, or CO<sub>2</sub> in a liquefaction terminal which would freeze at a much higher temperature  
 649 than methane liquefies, and therefore lead to blockages/system shutdown at the facility.

650 After the mining process in the model, fossil methane gas then passes to an upstream process for  
 651 the collection and processing of fossil methane gas from the well-heads to gas processing plants.  
 652 Regionalised operation and maintenance costs are associated with this processing technology, as  
 653 well as historical capacities. Additionally, a distinction is made between the gathering and processing  
 654 of non-associated conventional fossil methane gas, and unconventional fossil methane gas. This  
 655 process (taking into account emissions intensities, efficiencies, and any required energy inputs) turns  
 656 the output gas from the mining process into an energy commodity which can either be traded  
 657 internationally, via pipeline or LNG, or can be used as ‘useful’ input downstream (in conversion or  
 658 end use sectors).

659 Due to its large regional-scale and intensive data requirements, TIAM-UCL is not able to accurately  
 660 reflect the techno-economic characteristics of smaller downstream distribution networks for fossil  
 661 methane gas (e.g. distribution networks in urban areas which transport gas to individual households  
 662 for cooking and heating service demand) due to the granularity required to effectively model such  
 663 networks. However, additional user constraints have been added in the model to prevent  
 664 excessively large and unrealistic uptake of downstream fossil methane gas, particularly for the  
 665 residential sector, in regions/sub-regions where this is highly unlikely, at least in the near-term.

666 Additionally, underlying capacities and new capacity costs have been added into TIAM-UCL for  
 667 associated fossil methane gas<sup>10</sup>, in order to reflect the fact that whilst it is produced as a relatively  
 668 low cost by-product of oil, it still requires infrastructure to be in place, and is therefore a key reason  
 669 behind large-scale flaring and venting in some regions. Supplementary Table 13 shows a range of  
 670 investment and O&M costs for associated fossil methane gas projects, which have been  
 671 incorporated in TIAM-UCL. These improvements led to a more accurate recalibration of actual  
 672 production volumes of associated fossil methane gas in the near-term. Associated gas is modelled  
 673 differently, in the sense that the supply cost is the cost of separating and processing the gas to yield  
 674 ‘dry stripped gas’ (essentially pure methane). This is because associated gas is based on oil  
 675 extraction economics, and therefore a field level analysis was not possible. The TIAM-UCL model has  
 676 been amended to include region-specific operational costs associated with separating and  
 677 processing, as well as investment costs (CAPEX) for building new associated gas processing capacities  
 678 if necessary.

679

680

681 **Supplementary Table 13. Range of associated fossil methane gas investment and operational costs**

682

| Associated gas production field/region | CAPEX, \$/MMBtu | OPEX, \$/MMBtu | Region (Country)                 | Source                             |
|----------------------------------------|-----------------|----------------|----------------------------------|------------------------------------|
| Bakken                                 |                 | 0.31-0.67      | United States (USA)              | EIA (2016) <sup>36</sup>           |
| Grand Rapids Bitumen                   | 11.25           | 0.62           | Canada (Canada)                  | AER (2018) <sup>37</sup>           |
| Tengiz                                 | 2.40            |                | Former Soviet Union (Kazakhstan) | Carbon Limits (2013) <sup>38</sup> |

|                  |      |           |                            |                                    |
|------------------|------|-----------|----------------------------|------------------------------------|
| Middle East OPEC |      | 0.8-1.3   | Middle East OPEC countries | IPAA (2015) <sup>39</sup>          |
| Utorogu          | 1.95 |           | Africa (Nigeria)           | OGJ (2016) <sup>40</sup>           |
| Nigeria offshore |      | 0.09-0.38 | Africa (Nigeria)           | Santley et al (2014) <sup>41</sup> |
| El Merk          |      | 0.27      | Africa (Algeria)           | Aissaoui (2016) <sup>42</sup>      |
| Gassi Touil      |      | 0.60      | Africa (Algeria)           | Aissaoui (2016) <sup>42</sup>      |
| Cantarell        |      | 0.18      | Mexico (Mexico)            | IMCO (2014) <sup>43</sup>          |
| Ku-Maloob-Zaap   |      | 0.11      | Mexico (Mexico)            | IMCO (2014) <sup>43</sup>          |

\* Sourced from Welsby, 2021<sup>10</sup>.

683  
684

## 685 Oil

686 Oil generally requires the most refining, upgrading and processing in the upstream sector prior to  
687 being sent further downstream (e.g. crude oil as a traded commodity, or derived naphtha as a  
688 feedstock into petrochemical production of plastics etc.). In particular, for some forms of  
689 unconventional oil, a huge operation is required to upgrade the oil to 'useful' forms of energy (e.g.  
690 crude oil), which requires large-scale investment in upgrading infrastructure and intensive energy  
691 inputs into the processes. For example, extra-heavy oil and bitumen oil require significant upgrading  
692 to reduce the viscosity of the oil from a tar-like liquid (hence the name tar-sands) to a less viscous  
693 compound which can be transported by pipeline. A significant part of the improvements made to the  
694 upstream sector of TIAM-UCL was to provide insights into the costs and availability of  
695 unconventional oil production<sup>9</sup>. These costs and material flows (including externalities associated  
696 with production of oil and gas, such as fugitive emissions, flaring, emissions from the upgrading  
697 process, etc.) can be separately assessed in the model prior to the processed product eventually  
698 being used downstream. These upstream processes to upgrade and process require energy inputs,  
699 which have a range of efficiencies and costs. This is important for ensuring cost and additional  
700 energy use, and emissions, are captured, beyond the energy use and emissions associated with the  
701 initial extraction phase. This is of particular importance for bitumen and extra-heavy oil, where the  
702 upgrading process can account for upwards of 50% of the production cost (i.e. generating synthetic  
703 crude).

704 TIAM-UCL has a detailed representation of the use of upstream energy fuels, whereby an energy  
705 commodity output from the upstream sector requires energy commodity inputs to produce a  
706 useable commodity downstream. An example of this would be the use of fossil methane gas in  
707 situ and mined oil sands production, whereby the gas is used to generate steam/heated water,  
708 which increases the temperature of the oil in the reservoir or separates the oil from the sand,  
709 increasing the viscosity which allows it to flow at sufficient rates<sup>44</sup>. Supplementary Table 14 shows a  
710 (simplified) section of the upstream for the production of crude oil from synthetic mined bitumen, as  
711 well as the upstream energy requirements (input commodities with subscript UPS\_).

712 **Supplementary Table 14. Example of upstream transformation for mined oil sands into synthetic crude oil**

713

| Mining process | Output commodity | Primary transformation | Input commodity | Output commodity (efficiency) |
|----------------|------------------|------------------------|-----------------|-------------------------------|
|----------------|------------------|------------------------|-----------------|-------------------------------|

|                          |           |                                                |                                                                                                            |                                                                                                       |
|--------------------------|-----------|------------------------------------------------|------------------------------------------------------------------------------------------------------------|-------------------------------------------------------------------------------------------------------|
| Oil sands, mined bitumen | Oil sands | Production of synthetic oil from mined bitumen | Oil sands<br>UPS_Fossil methane gas<br>UPS_Electricity<br>UPS_Heat (Steam)<br>UPS_Hydrogen<br>UPS_Biofuels | Crude oil (72%)<br>Heat<br>Flared and vented Fossil methane gas<br>CO <sub>2</sub><br>CH <sub>4</sub> |
|--------------------------|-----------|------------------------------------------------|------------------------------------------------------------------------------------------------------------|-------------------------------------------------------------------------------------------------------|

714

715 Energy trade

716 Once extracted and processed, fossil fuels can then be transported between regions. An underlying  
 717 trade matrix is used to determine inter-regional trade flow opportunities. For flexible forms of  
 718 transportation (i.e. by maritime transport), the number of trade links will be higher than more  
 719 constrictive forms of trading energy commodities (e.g. by pipeline, which are not just restricted by  
 720 cost but also by geopolitical and geographical constraints). Supplementary Figure 15a shows a  
 721 representative trade matrix for crude oil, with the number of trade links (represented by the number  
 722 1) significantly higher due to the flexibility of ocean tankers over pipelines, with the significantly  
 723 lower number of trade links for fossil methane gas via pipeline shown in Supplementary Figure 15b.  
 724 The comments in this figure reflect some of the main uncertainty in pipeline routes, with the several  
 725 projects stalling over several years and with no final investment decision taken. Therefore, the  
 726 decision whether to switch these trade links on/off rests with the user.

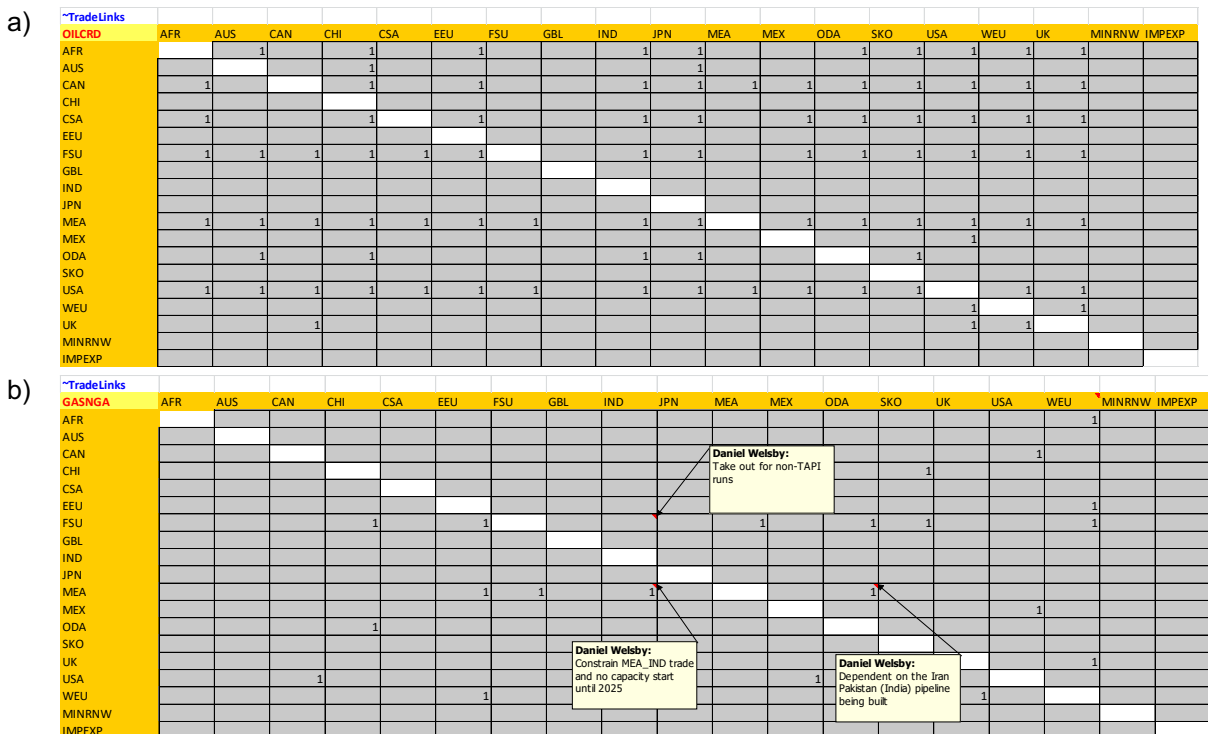

727

728 **Supplementary Figure 15. Trade links between TIAM-UCL regions for a) crude oil and b) fossil methane gas**  
 729 **via pipeline**

730

731 Coal

732 It is assumed in TIAM-UCL that only higher-grade coal is traded; i.e. sub-bituminous, bituminous and  
 733 anthracite. All trade flows for coal have been recalibrated in the model to ensure that 2015-2020

734 flows of coal around the world are consistent with historical data<sup>45,46</sup>. As with fossil methane gas  
 735 (and oil) discussed subsequently, the trade of coal incurs costs, namely for its transportation via  
 736 international shipping or across land-borders (i.e. by rail). The transportation costs, as with fossil  
 737 methane gas and oil, are determined based on average shipping/train capacities and rental rates,  
 738 and the distance between the regions. However, unlike fossil methane gas which requires  
 739 processing, transformation and transportation infrastructure (e.g. liquefaction plants and pipelines),  
 740 coal can be more easily transported and therefore it is assumed no investment costs are required.

741 Fossil methane gas

742 Fossil methane gas trade in TIAM-UCL is split between pipeline gas and liquefied natural gas (LNG).  
 743 Both are constrained firstly by the underlying trade matrix shown above. Additionally, trade volumes  
 744 and infrastructure have been calibrated to 2015/2020-2025, with under construction infrastructure  
 745 (both pipeline and LNG) fixed to come online in the model by 2020/2025, depending on an  
 746 estimated start-date<sup>21,47</sup>. For example, Supplementary Figure 16 shows under construction  
 747 regasification capacity for China between 2016 and 2022, which is used to bound the build rates of  
 748 trade infrastructure capacity.

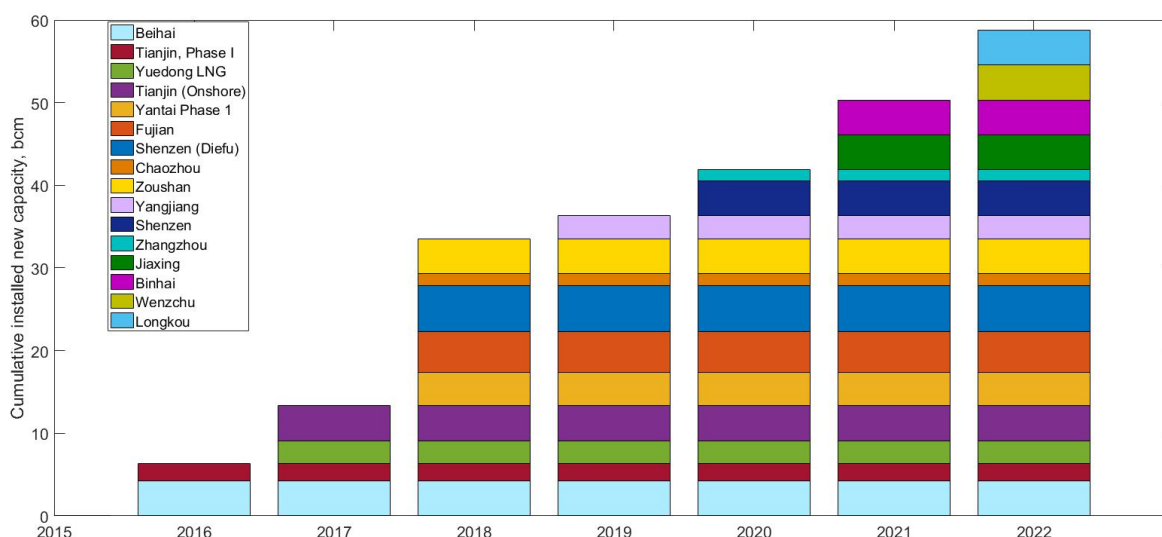

749 **Supplementary Figure 16. Cumulative installed regasification capacity in China, 2016-2022.** Source data are  
 750 provided as a Source Data file. Source: IGU, 2019<sup>48</sup>  
 751

752 Liquefied fossil methane gas trade in TIAM-UCL includes infrastructural parameters (liquefaction and  
 753 regasification capacities, and build constraints) and cost parameters (CAPEX on new infrastructure,  
 754 OPEX on the liquefaction/regasification process, and a shipping cost). Regionalised liquefaction costs  
 755 have been included based on:  
 756

- 757 • Representative projects in each region, including the location of the liquefaction terminal  
 758 and investment costs;
- 759 • Competition for E&P in recent years which led to real price inflation on projects built  
 760 between 2010 and 2020<sup>49</sup>;
- 761 • Whether the project was a brownfield extension or conversion (e.g. conversion of  
 762 regasification (import) terminals in the United States into liquefaction (export) facilities), or  
 763 green-field integrated project (e.g. Yamal LNG field and export facility development in

764 Russia, and several projects in Australia including Gorgon, Ichthys (floating), and  
 765 Wheatstone).  
 766

767 Supplementary Table 15 shows a range of investment costs for liquefaction terminals in TIAM-UCL,  
 768 showing the cost inflation attributed to a large range of projects coming online at the same time,  
 769 and the corresponding stabilisation of these costs. It clearly shows which regions have the potential  
 770 to take advantage of cost de-escalation for brownfield conversions/expansions<sup>50</sup>, i.e. the USA and  
 771 the Middle East, before (at least in this example) costs converge across regions for green-field  
 772 investments. Additionally, the amount of capacity which can be converted / expanded under these  
 773 lower costs has been limited to existing regasification capacity and/or a maximum upper limit based  
 774 on proposed brownfield extensions.

775

776 **Supplementary Table 15. Liquefaction investment costs by region and year in TIAM-UCL, \$M/PJ**

777

| Year | AFR | AUS | CAN | CHI | CSA | EEU | FSU | IND | JPN | MEA | MEX | ODA | SKO | UK | USA | WEU |
|------|-----|-----|-----|-----|-----|-----|-----|-----|-----|-----|-----|-----|-----|----|-----|-----|
| 2006 | 6   | 6   | 6   | 6   | 6   | 6   | 6   | 6   | 6   | 6   | 6   | 6   | 6   | 6  | 6   | 6   |
| 2010 | 16  | 16  | 16  | 14  | 16  | 18  | 16  | 14  | 16  | 9   | 16  | 14  | 14  | 18 | 9   | 18  |
| 2015 | 10  | 20  | 16  | 14  | 16  | 18  | 16  | 14  | 16  | 9   | 16  | 14  | 14  | 18 | 9   | 18  |
| 2020 | 10  | 21  | 22  | 20  | 20  | 20  | 20  | 20  | 20  | 10  | 20  | 20  | 20  | 20 | 12  | 20  |
| 2025 | 25  | 21  | 22  | 20  | 20  | 20  | 20  | 20  | 20  | 10  | 20  | 20  | 20  | 20 | 12  | 20  |
| 2050 | 20  | 21  | 20  | 20  | 20  | 20  | 20  | 20  | 20  | 18  | 20  | 20  | 20  | 20 | 12  | 20  |

778 \* Sourced from Songhurst, 2014; 2018<sup>49,50</sup>; adapted by Welsby, 2021<sup>10</sup>. Note \$M refers to million USD per petajoule.

779

780 LNG variable O&M (i.e. shipping) costs in TIAM-UCL are calculated based on a range of  
 781 parameters<sup>10,51</sup>:

- 782 • Assumed distance between ports
- 783 • Average speed of tanker
- 784 • Average capacity of tanker; calculated based on average capacity of tankers which are  
 785 assigned to fixed routes and/or average size of delivery
- 786 • Daily rental rate of tanker which is highly volatile depending on available capacities in each  
 787 basin and seasonal spikes in LNG demand<sup>52</sup>; however, for a long-term energy systems model  
 788 a fixed figure is assumed based on McGlade et al.<sup>51</sup>.
- 789 • Boil-off rate (i.e. efficiency of transportation process translated into losses of fossil methane  
 790 gas), which in turn is a function of journey time
- 791 • Loading/unloading time at each port  
 792

793 A database of LNG transportation costs has been developed<sup>10</sup>, with representative average shipping  
 794 costs between the TIAM-UCL regions used if more than one trade route is used. An example of these  
 795 shipping costs between individual liquefaction and regasification terminals is shown in  
 796 Supplementary Table 16 below. For reference, the exporters are in red, and the zeros reflect that a)

797 there is no intra-regional trade in TIAM-UCL and b) some regions are exogenously determined  
 798 (through the trade link matrix shown) not to be able to trade with each other.

799 User constraints for fossil methane gas trade through LNG are employed for both the technology  
 800 which covers overall export capacity (i.e. the liquefaction process technology) and the bilateral trade  
 801 process itself. In short, this constrains the model from building new capacity too quickly and sending  
 802 all of the potential output through a single trade link.

803  
 804 **Supplementary Table 16. Representative shipping costs for LNG between TIAM-UCL regions, \$M/PJ**  
 805

|     | AFR | AUS | CAN | CHI  | CSA  | EEU  | FSU  | IND  | JPN  | MEA  | MEX  | ODA  | SKO  | UK   | USA | WEU  |
|-----|-----|-----|-----|------|------|------|------|------|------|------|------|------|------|------|-----|------|
| AFR | 0   | 0   | 0   | 1.09 | 0.26 | 0    | 0    | 0.84 | 1.28 | 0.63 | 1.06 | 1.02 | 1.19 | 0.83 | 0   | 0.81 |
| AUS | 0   | 0   | 0   | 0.75 | 0    | 0    | 0    | 0.96 | 0.8  | 0    | 0    | 0.73 | 0.8  | 0    | 0   | 0    |
| CAN | 0   | 0   | 0   | 0.85 | 0    | 0    | 0    | 1.2  | 0.81 | 0    | 0.62 | 0.85 | 0.82 | 0    | 0   | 0    |
| CHI | 0   | 0   | 0   | 0    | 0    | 0    | 0    | 0    | 0    | 0    | 0    | 0    | 0    | 0    | 0   | 0    |
| CSA | 0   | 0   | 0   | 1.07 | 0    | 0    | 0    | 0.97 | 1.14 | 0.91 | 0.78 | 1.15 | 1.12 | 0.81 | 0   | 0.8  |
| EEU | 0   | 0   | 0   | 0    | 0    | 0    | 0    | 0    | 0    | 0    | 0    | 0    | 0    | 0    | 0   | 0    |
| FSU | 0   | 0   | 0   | 0.72 | 0    | 0    | 0    | 1.39 | 0.59 | 0    | 0    | 1.38 | 0.66 | 0.81 | 0   | 0.8  |
| IND | 0   | 0   | 0   | 0    | 0    | 0    | 0    | 0    | 0    | 0    | 0    | 0    | 0    | 0    | 0   | 0    |
| JPN | 0   | 0   | 0   | 0    | 0    | 0    | 0    | 0    | 0    | 0    | 0    | 0    | 0    | 0    | 0   | 0    |
| MEA | 0   | 0   | 0   | 0.83 | 0.81 | 1.02 | 0    | 0.6  | 0.94 | 0    | 1.28 | 0.74 | 0.92 | 0.97 | 0   | 0.85 |
| MEX | 0   | 0   | 0   | 0    | 0    | 0    | 0    | 0    | 0    | 0    | 0    | 0    | 0    | 0    | 0   | 0    |
| ODA | 0   | 0   | 0   | 0.66 | 0    | 0    | 0    | 0.71 | 0.73 | 0    | 0    | 0    | 0.69 | 0    | 0   | 0    |
| SKO | 0   | 0   | 0   | 0    | 0    | 0    | 0    | 0    | 0    | 0    | 0    | 0    | 0    | 0    | 0   | 0    |
| UK  | 0   | 0   | 0   | 0    | 0    | 0    | 0    | 0    | 0    | 0    | 0    | 0    | 0    | 0    | 0   | 0    |
| USA | 0   | 0   | 0   | 1.09 | 0.84 | 0.91 | 0    | 1.21 | 1.11 | 0    | 0.72 | 1.1  | 1.09 | 0.85 | 0   | 0.9  |
| WEU | 0   | 0   | 0   | 0    | 0    | 0.63 | 0.64 | 0    | 0    | 0    | 0    | 0    | 0    | 0    | 0   | 0    |

806 \* Sourced from Welsby, 2021<sup>10</sup>.

807 For pipeline investment costs and capacity additions in the near-term, individual project costs and  
 808 capacity have been added where appropriate (e.g. pipeline cost and maximum volume from Russia  
 809 to China between 2015 and 2020 are based on the Power of Siberia pipeline, which came online at  
 810 the end of 2019). Some examples of pipeline investment costs are shown in Supplementary Table  
 811 17, with each pipeline at different development stage<sup>10</sup>. However, other factors need to be taken  
 812 into account including whether the pipeline has to cross challenging physical barriers (e.g. a sea or  
 813 mountainous territory).

814 **Supplementary Table 17. Pipeline investment costs for a range of representative projects used in TIAM-UCL**  
 815

| Pipeline Name      | Status             | Investment Cost, \$M/PJ | Investment Cost, \$M/km |
|--------------------|--------------------|-------------------------|-------------------------|
| Power of Siberia   | Under-construction | 10.38-23.02             | 5.27-11.67              |
| Central Asia-China | Operational        | 3.51                    | 3.99                    |
| TAPI               | Proposed           | 6.66-8.33               | 7.11-8.89               |

816  
 817 Additionally, a user constraint has been added as an upper bound on potential gas pipeline trade,  
 818 with a similar functional form as the upstream constraints discussed in the section that follows. In  
 819 short, it is assumed that the model can, at a maximum, double capacity across a ten year period for



820 any trade route (e.g. add a new pipeline parallel to an existing one with the same capacity)<sup>10</sup>.  
821 Therefore, an exponential growth constraint is set in the following form shown in Equation 1:

822

823

824

$$825 \quad PipeCap_{a \rightarrow b, t} \leq PipeCap_{a \rightarrow b, t-1} * PipeGro^{ts} + Seed_{r, t} \quad (1)$$

826

827 Where,

828

829  $PipeCap_{a \rightarrow b, t}$  = pipeline capacity between exporter  $a$  and importer  $b$ , in time period  $t$

830  $PipeCap_{a \rightarrow b, t-1}$  = pipeline capacity between exporter  $a$  and importer  $b$ , in time period  $t-1$ , i.e. the  
831 preceding time period

832  $PipeGro^{ts}$  = pipeline growth coefficient, set at  $\sim 1.07$  (i.e. allows a doubling of capacity over 10 years  
833 using the above formulation)

834

835  $Seed_{r, t}$  = seed value for region  $r$  and time-period  $t$ , which allows growth value to take hold if there  
836 is no historical trade link, or adds on to the growth constraint for absolute upper bound  
837 (i.e. slackness on the constraint). The seed value is added across the time-slice, rather  
838 than in each individual year. As with LNG, this is based on a maximum capacity addition  
839 across a time-slice.

840

841 For regions where volumes of trade are already well established and there is significant pipeline  
842 capacity in place, the seed value has been set to zero from 2020 (e.g. between the UK and Western  
843 Europe, and the USA and Canada). A seed value is included in these cases between 2006 and 2015 in  
844 case large increases in gas pipeline trade were in evidence, such as between the United States and  
845 Mexico after the expansion of shale gas in the Barnett shale play. In short, the seed value allows the  
846 model to expand trade up to the upper bounds which have been added for 2015 to calibrate fossil  
847 methane gas trade to historical data. However, some trade links have a seed value from 2020 to  
848 allow the model to expand pipeline capacity over the growth coefficient alone. For example, the  
849 seed value for gas pipeline trade between the Former Soviet Union and China is bounded (upper) by  
850 the growth coefficient (1.07/a) and a seed value equivalent to the Power of Siberia pipeline  
851 operating between a minimum (70%) and maximum (90%) contracted quantity<sup>10</sup>.

852

### 853 Oil

854 The trade of oil commodities is split into various different products, which are outputs of processing  
855 / transformation processes in the upstream: crude oil, heavy fuel oil, naphtha, gas liquids, and diesel.  
856 As with fossil methane gas trade via LNG tankers, the variable cost of transporting oil via tankers is  
857 assumed to be a function of the distance between ports, the speed of the tanker, and the average  
858 capacity of a ship travelling from the exporter to the importer.

859

### 860 **Key upstream constraints**

#### 861 Coal

862 Upstream constraints for coal extraction are not as widely applied for two main reasons. Firstly, the  
 863 extraction of coal does not follow the same geological production profile of oil and gas extraction;  
 864 i.e. the growth and decline of production profiles through time and different geological structures.  
 865 Secondly, for decarbonisation scenarios meeting 2°C and below, coal is rapidly phased out of the  
 866 energy mix. Traditionally, this decline has not been constrained in previous iterations of TIAM-UCL,  
 867 however in this paper we have constrained the rate at which coal can be phased out of the energy  
 868 system.

869 Oil and fossil methane gas

870 There are a range of upstream user constraints which control the rate at which production of  
 871 different categories of oil and gas can grow/decline. In short, these user constraints model the  
 872 natural growth and decline of oil and fossil methane gas. The predominant form of constraint is an  
 873 exponential (constant) rate of growth/decline across a time-slice, using seed values if there is no  
 874 residual (historical) productive capacity. Equation 2 shows the functional form of these growth (a)  
 875 and decline (b) constraints, for extractive technologies with historical production, while (c) and (d)  
 876 shows the same equations for technologies which have no historical production and therefore  
 877 require a seed value.

878  $Production_{i,t} \leq (Production_{i,t-1} * Growth^{ts}) + Seed_{i,t}$  (2 (a))

879  
 880  $Production_{i,t} \geq (Production_{i,t-1} * Decline^{ts}) + Seed_{i,t}$  (2 (b))

881  
 882  $Production_{i,t} \leq Seed_{i,t} * Growth^{ts}$  (2 (c))

883  
 884  $Production_{i,t} \geq Seed_{i,t} * Decline^{ts}$  (2 (d))

885  
 886 Where,  
 887  $Production_i$  = production of oil/gas for mining process  $i$   
 888  $Seed_i$  = seed value from which growth/decline coefficients are assigned to if no historical (i.e.  $t-$   
 889  $1$ ) volumes, and which is added to overall growth/decline constraint across each time-slice  
 890  $t$  = time period in the model (therefore  $t-1$  is the previous time-slice)  
 891  $Growth$  = growth coefficient, where  $Growth \geq 1$   
 892  $Decline$  = decline coefficient, where  $Decline \leq 1$   
 893  $ts$  = time-slice length (i.e.  $t - (t-1)$ )

894  
 895 Therefore, for growth constraints, the production of an oil and/or gas mining technology in time slice  
 896  $t$  will be bounded (upper) by a maximum of production in time slice  $t-1$  multiplied by the growth  
 897 coefficient to the power of the length of the time-slice. For decline constraints, the inverse applies:  
 898 production in  $t$  will be bounded (lower) by a minimum of production in  $t-1$  multiplied by the decline  
 899 coefficient to the power of the time-slice length. Supplementary Table 18 shows examples of the  
 900 growth/decline coefficient parameters and seed values used in TIAM-UCL, for a range of oil (a) and  
 901 gas (b) mining technologies.

902 For example, shale gas decline rates were calculated using well-level data from the United States  
 903 (Marcellus)<sup>10</sup>. Over 950 shale gas wells were assessed over a 10 month period; the rate of decline for  
 904 these wells, when aggregated, best fit a hyperbolic profile. The rate of change between the first year

905 and last year was then calculated to give a constant annual rate of decline. In order to generate a  
 906 decline parameter which fits the formulation of user constraints in TIAM-UCL (Equations 2 (a-d)), this  
 907 annual decline rate was then re-calculated to an equivalent rate of decline but as a constant  
 908 exponential rate of decline. For the shale gas wells examined, this translates as a decline coefficient  
 909 of  $\sim 0.83$ , which when raised to the power of 5 (assuming a five year time-slice), gives a maximum  
 910 rate of decline of  $\sim 60\%$  between  $t-1$  and  $t$ . Additional constraints have been input as a proxy for  
 911 controlling the expansion of associated fossil methane gas. Whilst the production itself is a function  
 912 of oil extraction (and oil economics), the infrastructural issues surrounding associated gas utilisation  
 913 require some degree of user constraint. Therefore, an upstream constraint is placed on the speed at  
 914 which associated gas processing and separation capacity can be added.

915 **Supplementary Table 18. a) User constraints for a range of oil mining technologies extraction processes and**  
 916 **b) gas extraction processes in TIAM-UCL**  
 917

918 a)

| Mining technology              | Growth coefficient  | Decline coefficient |
|--------------------------------|---------------------|---------------------|
| Conventional proved reserves   | 1.41 ( $\sqrt{2}$ ) | 0.93                |
| Conventional reserve additions | 1.41 ( $\sqrt{2}$ ) | 0.93                |
| Conventional undiscovered      | 1.41 ( $\sqrt{2}$ ) | 0.93                |
| Shale oil                      | 1.07                | 0.8                 |
| Mined bitumen                  | 1.07                | 0.8                 |
| In-situ bitumen                | 1.1                 | 0.85                |

919

920 b)

| Mining technology              | Growth coefficient  | Decline coefficient |
|--------------------------------|---------------------|---------------------|
| Conventional proved reserves   | 1.41 ( $\sqrt{2}$ ) | 0.95                |
| Conventional reserve additions | 1.41 ( $\sqrt{2}$ ) | 0.92                |
| Conventional undiscovered      | 1.41 ( $\sqrt{2}$ ) | 0.92                |
| Shale gas                      | 1.27                | 0.83                |
| Tight gas                      | 1.12                | 0.83                |
| Coal bed methane               | 1.12                | 0.83                |

921

922 Note: Regional variations are taken into account; therefore the numbers above may differ between regions. Additionally,  
 923 the decline rate for conventional oil and gas fields will vary depending on the size of the field, the stage of decline, and the  
 924 geological structure of the reservoirs (IEA, 2009). For example, larger fields generally exhibit slower rates of production  
 925 decline, as shown with the value for conventional proved gas reserves which is taken from a representative decline  
 926 parameter calculated from super-giant gas fields in the Former Soviet Union (e.g. Urengoy)<sup>10</sup>.

927

### 928 Supply chain emissions from upstream fossil fuel activity

929 TIAM-UCL accounts for methane leakage from the gas supply chain, with a user-defined percentage  
 930 of total fossil methane gas supply being lost into the atmosphere (i.e. direct methane emissions).  
 931 Distinctions are made between conventional and unconventional fossil methane gas. A central  
 932 methane leakage rate was derived across a range of literature<sup>10</sup>. The global warming potential of  
 933 methane in TIAM-UCL is calculated over a 100-year time horizon (GWP-100), therefore where  
 934 studies reported a different GWP time-period (e.g. 25 years), these were converted to GWP-100. For  
 935 this study, our global average central leakage rate assumptions were 1.7% for conventional  
 936 fossil methane gas and 2.1% for unconventional gas.

937 In addition to gas supply chains, TIAM-UCL also tracks methane emissions from oil and coal supply  
 938 chains. For oil, fugitive methane emissions or intentional venting of methane is directly related to  
 939 the presence of associated fossil methane gas. In short, if there is no infrastructure in place and/or  
 940 demand downstream to absorb associated gas, the methane is either directly released into the  
 941 atmosphere (venting) or flared (burnt-off) and released as CO<sub>2</sub>. TIAM-UCL has various options for  
 942 mitigating methane emissions from oil supply chains. Firstly, the model can build capacity to utilise  
 943 rather than flare/vent fossil methane gas produced as a by-product of oil production (see  
 944 Supplementary Table 13).

945 Additionally, there is also a dummy option where the model can chose to flare rather than vent the  
 946 methane if there is no demand for gas downstream/if building capacity is not cost optimal.  
 947 Therefore, instead of methane being released into the atmosphere, CO<sub>2</sub> is instead emitted. As with  
 948 oil, there are options available to minimise methane emissions from coal mining. These include an  
 949 option to gather the methane and inject it into pipelines for use downstream, or a dummy option to  
 950 flare the gas, therefore releasing CO<sub>2</sub> into the atmosphere rather than methane.

951  
 952  
 953

954 **SI section 6. Key assumptions used in TIAM-UCL v4.1.1**

955 This supplementary information describes some of the core assumptions used in this analysis.  
 956 Additionally, the individual countries making up each region in TIAM-UCL are listed in Supplementary  
 957 Table 26. Many of the same model assumptions were used in this recent report by Pye et al.<sup>53</sup>.

958 **Demand drivers**

959 For most of the scenarios assessed, population and economic growth drivers are based on the SSP2  
 960 'Middle of the Road' scenario narrative. These drivers are used to construct the energy service  
 961 demands across different sectors. Some adjustments have been made to energy service demands to  
 962 ensure final energy demand globally falls within the SSP2 marker model (MESSAGE) range. As SSPs  
 963 are independent of climate ambition, defining the socio-economic backdrop that a given climate  
 964 ambition has to be achieved within, the demands for SSP2 in TIAM have been tuned to match the  
 965 marker model's base / reference SSP2 run with no climate constraints<sup>54</sup>. Region specific values are  
 966 used but global values are shown in Supplementary Table 19.

967 **Supplementary Table 19. Demand drivers used in TIAM-UCL scenarios**

| Category | Assumption | Values |      |      |      | Units            |
|----------|------------|--------|------|------|------|------------------|
|          |            | 2030   | 2050 | 2080 | 2100 |                  |
| SSP2     | Population | 8.3    | 9.2  | 9.4  | 9.0  | billion          |
|          | GDP        | 17     | 25   | 42   | 59   | 000 US\$2005/cap |

968

969 **Bioenergy characterisation and availability**

970 Bioenergy is characterised into first and second generation fuels. First generation fuels are  
 971 represented as bioliquids (bioethanol and biodiesel from crops which might compete with food  
 972 crops for land) and biomethane (gas captured from controlled landfill sites). Four types of second-  
 973 generation bioenergy feedstock distinguished: i) Solid biomass (BIOSLD), comprising woody residues  
 974 from forestry and agriculture; ii) Energy crops (BIOCRP), comprising second generation purposely  
 975 grown energy crops (grassy and woody bioenergy crops); iii) Municipal waste (BIOBMU), comprises  
 976 wastes produced by households, industry, hospitals and the tertiary sector that are collected by local

977 authorities; and iv) Industrial waste (BIOBIN), Solid and liquid products (e.g. tyres, sulphite lyes  
 978 (black liquor), animal materials/wastes), usually combusted directly in specialised plants to produce  
 979 heat and/or power. For each of these fractions cost supply curves are specified within the model for  
 980 each of the 16 regions, i.e. amount of biomass available at different costs in each region. Cost ranges  
 981 for solid biomass range between 4-16 \$/GJ, and for energy crops between 9-15 \$/GJ, with zero cost  
 982 for waste fractions. To avoid competition for land, energy crops are assumed to be grown only on  
 983 marginal and degraded land. Importantly, only solid biomass and energy crops fractions can be used  
 984 for BECCS, and traded between regions. Supplementary Table 20 lists the global potentials for each  
 985 bioenergy type.

986

987 **Supplementary Table 20. Bioenergy availability (central estimates)**

| Bioenergy category | Values by year, EJ potential |      |      |      | Source                                                                                                                                                                                                             |
|--------------------|------------------------------|------|------|------|--------------------------------------------------------------------------------------------------------------------------------------------------------------------------------------------------------------------|
|                    | 2030                         | 2050 | 2080 | 2100 |                                                                                                                                                                                                                    |
| Solid biomass      | 43                           | 45   | 48   | 50   | Daiglou et al. (2016) <sup>55</sup>                                                                                                                                                                                |
| Energy crops       | 17                           | 31   | 31   | 31   | Marginal land availability and energy crop yields from Ricardo-AEA. (2017) <sup>56</sup> . Biomass Feedstock Availability. Final report for BEIS. Supply cost curves based on Hoogwijk et al. (2009) <sup>57</sup> |
| MSW                | 17                           | 27   | 27   | 28   | TIAM-ETSAP                                                                                                                                                                                                         |

988

989 **Conversion technology assumptions**

990 A key input into the TIAM-UCL model is the assumptions on costs and performance of different  
 991 conversion technologies, which produce low carbon vectors. This section provides an overview of  
 992 the key assumptions for different technology groups. Supplementary Table 21 provides information  
 993 regarding the power generation sector. An important constraint for this sector is one that prevent  
 994 unabated coal generation disappearing at too rapid a speed i.e. no faster than observed in the  
 995 fastest power generation transition. For this, we use the phase out dates under the Powering Past  
 996 Coal Alliance (PPCA). This is 2030 for OECD and EU members, and 2050 for others (except the  
 997 European countries that have already committed to earlier dates).

998 The assumptions for the suite of BECCS technologies available in the model can be found in  
 999 Supplementary Table 22. The main 'brake' on this technology set is the bioenergy resource  
 1000 availability. The other negative emission technology in TIAM-UCL is Direct Air Capture (DAC) which  
 1001 draws on heat and electricity inputs to capture CO<sub>2</sub> directly from the atmosphere and sequester it.  
 1002 Supplementary Table 23 has the cost and technical lifetime assumptions used for DAC.

1003 On the supply side, hydrogen production technologies are divided into three different scales:  
 1004 centralised large-scale, centralised medium and decentralised small-scale production. Large-scale  
 1005 plants are based on biomass, coal and gas with continuous production of hydrogen. These plants are  
 1006 available with and without CCS technology. Hydrogen produced from centralised plants are  
 1007 transported with two different transportation options: long-distance pipe line transportation  
 1008 (gaseous hydrogen) and liquefaction plus trucks (liquid hydrogen). Hydrogen production data is  
 1009 presented in Supplementary Table 24, and are based on the review by Dodds and McDowall, 2012<sup>58</sup>.

1010

1011 **Supplementary Table 21. Power generation costs and efficiency assumptions**

| Technology                   | CAPEX, \$2005 /kW |           |           |           |           | Efficiency, % |      |      |      |
|------------------------------|-------------------|-----------|-----------|-----------|-----------|---------------|------|------|------|
|                              | 2010              | 2020      | 2030      | 2040      | 2050      | 2010          | 2020 | 2030 | 2050 |
| MSW combustion               | 5236              | 4862      | 4488      |           | 4114      | 23            | 27   | 30   | 33   |
| Bioenergy combustion         | 2618              | 2431      | 2244      |           | 2057      | 28            | 31   | 34   | 37   |
| Bioenergy combustion (dcn)   | 2880              | 2674      | 2468      |           | 2263      | 28            | 31   | 34   | 37   |
| Bioenergy gasification       | 3080              | 2860      | 2640      |           | 2420      | 31            | 34   | 37   | 40   |
| Bioenergy gasification (dcn) | 3388              | 3146      | 2904      |           | 2662      | 31            | 34   | 37   | 40   |
| Coal IGCC                    | 2376              |           |           |           |           | 44            | 48   | 51   | 54   |
| Coal super critical          | 1870              |           |           |           |           | 41            | 42   | 42   | 42   |
| Coal ultra super critical    | 2277              |           |           |           |           | 46            | 48   | 49   | 50   |
| Gas CCGT                     | 990               |           |           |           |           | 56            | 59   | 61   | 63   |
| Oil generation (dcn)         | 659               |           |           |           |           | 31            | 31   | 31   | 31   |
| Oil generation               | 495               |           |           |           |           | 38            | 39   | 40   | 42   |
| Coal IGCC w/CCS              |                   | 3802      | 3564      |           | 3326      |               | 38   | 43   | 48   |
| Coal USC w/CCS               |                   | 3643      | 3416      |           | 3188      |               | 39   | 42   | 46   |
| Gas CCGT w/CCS               |                   | 1584      | 1485      |           | 1386      |               | 49   | 53   | 57   |
| Geothermal shallow           | 2376              | 2310      | 2255      | 2200      | 2129      |               |      |      |      |
| Geothermal deep              | 3911              | 3644      | 3383      | 3108      | 2846      |               |      |      |      |
| Geothermal very deep         |                   | 4978      | 4510      | 4015      | 3564      |               |      |      |      |
| Hydro dam                    | 1650-6050         | 1623-5913 | 1595-5775 | 1568-5638 | 1540-5500 |               |      |      |      |
| Solar CSP                    | 5850              | 3330      | 2700      | 2385      | 2070      |               |      |      |      |
| Solar PV                     | 2587              | 667       | 437       |           | 288       |               |      |      |      |
| Tidal                        | 6600              | 5500      | 4400      |           | 3432      |               |      |      |      |
| Offshore wind                |                   | 3229      | 2507      | 1983      | 1591      |               |      |      |      |
| Onshore wind                 |                   | 1110      | 1011      | 949       | 919       |               |      |      |      |
| Nuclear Advanced LWR         | 4166              | 3939      | 3849      |           | 3623      |               |      |      |      |
| Storage                      | 3300              | 1359      | 1051      | 700       | 510       | 80            | 80   | 80   | 80   |

1012

1013 Source: All costs presented above are averages across the 16 regions in TIAM-UCL, however in the model, costs are  
 1014 differentiated across the different regions. Fossil and CCS technologies (Ekins et al. (2017)<sup>59</sup>; Rubin et al. (2015)<sup>60</sup>); CCS is  
 1015 available from 2030, and can see capacity growth of a maximum of 5% per annum. Power generation technologies have  
 1016 capture rates of 90%, which do not improve over time. Future solar PV and wind reductions based on BNEF estimates  
 1017 (unpublished), recent cost estimates based on IRENA<sup>2</sup>. The maximum build rate of new solar PV and wind capacity each  
 1018 year is set at 30% of existing capacity in line with recent solar PV build rates<sup>4</sup>. Range for hydro denotes different resource  
 1019 tranches and cost of exploitation. In the above table, 'dcn' denotes 'decentralised'.

1020

1021

1022

1023

1024

1025

1026

1027 **Supplementary Table 22. a) BECCS technology costs and efficiency assumptions and b) other assumptions**

1028 a)

| Technology Group         | Technology Group                         | Efficiency % |      | Investment cost \$/kW |      | Fix cost \$/kW |      | Variable cost \$/GJ |      |
|--------------------------|------------------------------------------|--------------|------|-----------------------|------|----------------|------|---------------------|------|
|                          |                                          | 2030         | 2050 | 2030                  | 2050 | 2030           | 2050 | 2030                | 2050 |
|                          | Year                                     |              |      |                       |      |                |      |                     |      |
| Electricity              | Energy Crop Combustion w CCS             | 26           | 31   | 3060                  | 2618 | 175            | 131  | 6.9                 | 6.6  |
|                          | Energy Crop Gasification w CCS           | 29           | 34   | 3600                  | 3080 | 206            | 173  | 1.7                 | 1.7  |
|                          | Solid Biomass Combustion w CCS           | 26           | 31   | 3060                  | 2618 | 175            | 131  | 6.9                 | 6.6  |
|                          | Solid Biomass Gasification w CCS         | 29           | 34   | 3600                  | 3080 | 206            | 154  | 1.7                 | 1.7  |
| Heat                     | Heat from biomass with CCS               | 63           | 65   | 1671                  | 1419 | 189            |      |                     |      |
| Hydrogen                 | Hydrogen from biomass gasification + CCS | 42           | 44   | 4594                  | 3516 | 322            | 246  |                     |      |
| Advanced transport fuels | FT process w CCS using solid biomass     | 34           | 42   | 2235                  | 1565 | 27             | 27   | 0.8                 | 0.8  |
|                          | FT process w CCS using energy crops      | 34           | 42   | 2235                  | 1565 | 27             | 27   | 0.8                 | 0.8  |

1029 b)

| Technology Group         | Technology Group                         | Start time | Life yr | Availability / capacity factor | CO <sub>2</sub> Capture rate % | Build rate % |
|--------------------------|------------------------------------------|------------|---------|--------------------------------|--------------------------------|--------------|
| Electricity              | Energy Crop Combustion w CCS             | 2030       | 25      | 0.85                           | 90                             | 5            |
|                          | Energy Crop Gasification w CCS           |            |         |                                |                                |              |
|                          | Solid Biomass Combustion w CCS           |            |         |                                |                                |              |
|                          | Solid Biomass Gasification w CCS         |            |         |                                |                                |              |
| Heat                     | Heat from biomass with CCS               | 2030       | 30      | 0.6                            | 90                             | 3            |
| Hydrogen                 | Hydrogen from biomass gasification + CCS | 2030       | 30      | 0.9                            | 90                             | 5            |
| Advanced transport fuels | FT process w CCS using solid biomass     | 2030       | 30      | 0.9                            | 50                             | 5            |
|                          | FT process w CCS using energy crops      |            |         |                                |                                |              |

1030 Source: Butnar et al. 2020<sup>61</sup>

1032

1033 **Supplementary Table 23. Direct Air Capture costs and technical lifetime assumptions**

| Technology         | Life (yr) | Fixed O&M costs (\$2005/tCO <sub>2</sub> /yr) | Capital investment costs (\$2005/tCO <sub>2</sub> ) |
|--------------------|-----------|-----------------------------------------------|-----------------------------------------------------|
|                    |           | 2030                                          | 2030                                                |
| Direct air capture | 20        | 120                                           | 2900                                                |

1034

1035

1036

1037

1038 **Supplementary Table 24. Hydrogen production technology costs and efficiency assumptions**

| Technology           | Size           | Fixed O&M costs (% capital costs) | Capital investment costs (\$2005/GJ/y) |      |
|----------------------|----------------|-----------------------------------|----------------------------------------|------|
|                      |                |                                   | 2025                                   | 2050 |
| Coal gasification    | Large          | 0.05                              | 27                                     | 24   |
| Gas SMR              | Large          | 0.04                              | 7                                      | 5    |
| Gas SMR              | Small / medium | 0.04                              | 17                                     | 14   |
| Biomass gasification | Large          | 0.07                              | 26                                     | 26   |
| Biomass gasification | Medium         | 0.07                              | 34                                     | 34   |
| Biomass gasification | Small          | 0.07                              | 43                                     | 43   |
| Waste gasification   | Medium         | 0.07                              | 34                                     | 34   |
| Electrolysis         | Large          | 0.04                              | 7.7                                    | 2.4  |
| Electrolysis         | Medium         | 0.05                              | 8.8                                    | 2.7  |
| Electrolysis         | Small          | 0.05                              | 10                                     | 3.1  |

1039

1040 **Other key assumptions**

1041

- 1042 • LULUCF emissions. Land use and forestry (LULUCF) emissions of CO<sub>2</sub> are based on a fixed trajectory, using outputs from the IMAGE model, based on the RCP2.6 SSP2 case. They are net CO<sub>2</sub> emissions from deforestation, and reforestation in line with SSP2 RCP2.6 assumptions (Supplementary Table 25).
- 1043 • Non-CO<sub>2</sub> GHGs. Some non-energy sector sources of CH<sub>4</sub> and N<sub>2</sub>O are not explicitly represented in TIAM-UCL but rather included as an emissions trajectory based on the RCP database. Such sources include CH<sub>4</sub> from landfill and waste water, and agriculture (manure, rice paddies) and N<sub>2</sub>O from industry (nitric and adipic acid) and agriculture. In this modelling, the RCP2.6 trajectory is used for climate ambition cases (Supplementary Table 25). Emissions of these gases from the energy sector (e.g. CH<sub>4</sub> leakage from fossil methane gas extraction and transport) are capped under an overall constraint, which includes the sources above.
- 1044 • Discount rate. The social discount rate used in the calculation of net present value (used as the basis for the objective function) is set at 3.5%.
- 1045 • Base year. Model is calibrated based on 2005 IEA energy balances. Additional constraints have been introduced in the model to help represent the energy system in 2010 and 2015 - and to reflect projected emissions in 2020.

1051

1052 **Supplementary Table 25. LULUCF and non-CO<sub>2</sub> GHG emissions**

1053

| Emissions                   | Values by year |         |         |         | Units             | Source                                                                                                                                                                                                                                                                    |
|-----------------------------|----------------|---------|---------|---------|-------------------|---------------------------------------------------------------------------------------------------------------------------------------------------------------------------------------------------------------------------------------------------------------------------|
|                             | 2030           | 2050    | 2080    | 2100    |                   |                                                                                                                                                                                                                                                                           |
| CO <sub>2</sub> from LULUCF | 2.5            | 1.2     | -1.0    | -1.5    | GtCO <sub>2</sub> | Trajectory sourced from SSP Public Database (Version 1.1) hosted by IIASA<br><a href="https://tntcat.iiasa.ac.at/SspDb/dsd?Action=htmlpage&amp;page=welcome">https://tntcat.iiasa.ac.at/SspDb/dsd?Action=htmlpage&amp;page=welcome</a> .<br>Model-Scenario: IMAGE SSP2-26 |
| CH <sub>4</sub>             | 275,467        | 212,033 | 178,996 | 157,291 | Kt                |                                                                                                                                                                                                                                                                           |
| N <sub>2</sub> O            | 9297           | 8863    | 8320    | 7920    | Kt                |                                                                                                                                                                                                                                                                           |

1061

1062 Additional documentation for TIAM-UCL can be found on the Integrated Assessment Modelling Consortium (IAMC) wiki at [https://www.iamcdocumentation.eu/index.php/Model\\_Documentation\\_-\\_TIAM-UCL](https://www.iamcdocumentation.eu/index.php/Model_Documentation_-_TIAM-UCL).

1064



**Supplementary Table 26. List of regions and countries in the 16 region TIAM-UCL model**

| Region                          | Countries                                                                                                                                                                                                                                                                                                                                                                                                                                                                                                                                                                                            |
|---------------------------------|------------------------------------------------------------------------------------------------------------------------------------------------------------------------------------------------------------------------------------------------------------------------------------------------------------------------------------------------------------------------------------------------------------------------------------------------------------------------------------------------------------------------------------------------------------------------------------------------------|
| Africa (AFR)                    | Algeria, Angola, Benin, Botswana, Burkina Faso, Burundi, Cameroon, Cape Verde, Central African Republic, Chad, Comoros, Congo, Côte d'Ivoire, Democratic Republic of the Congo, Djibouti, Egypt, Equatorial Guinea, Eritrea, Ethiopia, Gabon, Gambia, Ghana, Guinea, Guinea-Bissau, Kenya, Lesotho, Liberia, Libya, Madagascar, Malawi, Mali, Mauritania, Morocco, Mozambique, Namibia, Niger, Nigeria, Rwanda, Sao Tome and Principe, Senegal, Seychelles, Sierra Leone, Somalia, South Africa, South Sudan, Sudan, Swaziland, Togo, Tunisia, Uganda, United Republic of Tanzania, Zambia, Zimbabwe |
| Australia (AUS)                 | Australia, New Zealand                                                                                                                                                                                                                                                                                                                                                                                                                                                                                                                                                                               |
| Canada (CAN)                    | Canada                                                                                                                                                                                                                                                                                                                                                                                                                                                                                                                                                                                               |
| Central and South America (CSA) | Anguilla, Antigua and Barbuda, Argentina, Aruba, Bahamas, Barbados, Belize, Bermuda, Bolivia, Brazil, Cayman Islands, Chile, Colombia, Costa Rica, Cuba, Dominica, Dominican Republic, Ecuador, El Salvador, Falkland Islands, Grenada, Guatemala, Guyana, Haiti, Honduras, Jamaica, Martinique, Netherlands Antilles, Nicaragua, Panama, Paraguay, Peru, Saint Kitts and Nevis, Saint Lucia, Saint Vincent and the Grenadines, Suriname, Trinidad and Tobago, Uruguay, Venezuela (Bolivarian Republic of)                                                                                           |
| China (CHI)                     | China, Taiwan, Tibet                                                                                                                                                                                                                                                                                                                                                                                                                                                                                                                                                                                 |
| Eastern Europe (EEU)            | Bosnia and Herzegovina, Bulgaria, Croatia, Czech Republic, Hungary, Montenegro, Poland, Romania, Serbia, Slovakia, Slovenia, The former Yugoslav Republic of Macedonia                                                                                                                                                                                                                                                                                                                                                                                                                               |
| Former Soviet Union (FSU)       | Armenia, Azerbaijan, Belarus, Estonia, Georgia, Kazakhstan, Kyrgyzstan, Latvia, Lithuania, Republic of Moldova, Russian Federation, Tajikistan, Turkmenistan, Ukraine, Uzbekistan                                                                                                                                                                                                                                                                                                                                                                                                                    |
| India (IND)                     | India                                                                                                                                                                                                                                                                                                                                                                                                                                                                                                                                                                                                |
| Japan (JAP)                     | Japan                                                                                                                                                                                                                                                                                                                                                                                                                                                                                                                                                                                                |
| Mexico (MEX)                    | Mexico                                                                                                                                                                                                                                                                                                                                                                                                                                                                                                                                                                                               |
| Middle-east (MEA)               | Bahrain, Brunei Darussalam, Cyprus, Iran (Islamic Republic of), Israel, Jordan, Kuwait, Lebanon, Occupied Palestinian Territory, Oman, Qatar, Saudi Arabia, Syrian Arab Republic, Turkey, United Arab Emirates, Yemen                                                                                                                                                                                                                                                                                                                                                                                |
| Other Developing Asia (ODA)     | Afghanistan, American Samoa, Bangladesh, Bhutan, Cambodia, Democratic People's Republic of Korea, Fiji, French Polynesia, Indonesia, Kiribati, Lao People's Democratic Republic, Malaysia, Maldives, Mauritius, Mongolia, Myanmar, Nepal, New Caledonia, Pakistan, Papua New Guinea, Philippines, Samoa, Singapore, Solomon Islands, Sri Lanka, Thailand, Timor-Leste, Tonga, Vanuatu, Vietnam                                                                                                                                                                                                       |
| South Korea (SKO)               | Republic of Korea                                                                                                                                                                                                                                                                                                                                                                                                                                                                                                                                                                                    |
| United Kingdom (UK)             | United Kingdom                                                                                                                                                                                                                                                                                                                                                                                                                                                                                                                                                                                       |
| USA (USA)                       | United States of America                                                                                                                                                                                                                                                                                                                                                                                                                                                                                                                                                                             |
| Western Europe (WEU)            | Albania, Andorra, Austria, Belgium, Denmark, Faroe Islands, Finland, France, Germany, Gibraltar, Greece, Greenland, Iceland, Ireland, Italy, Luxembourg, Malta, Monaco, Netherlands, Norway, Portugal, San Marino, Spain, Sweden, Switzerland, Vatican                                                                                                                                                                                                                                                                                                                                               |

1066

1067

1068

1069

1070

For reference, the following regions were aggregated to provide the regional unextractable shares reported in the main paper and in this supplementary information document: Europe = Eastern Europe, UK and Western Europe; Australia and other OECD Pacific = Australia and New Zealand, Japan, South Korea; China and India = China and India.

1071 **SI section 7. TIMES model formulation**

1072 TIAM-UCL uses the TIMES (The Integrated MARKAL-EFOM System) framework, a framework  
 1073 developed to explore and assess how energy systems may change over time, particularly in response  
 1074 to different policies e.g. climate or renewable energy targets, and drivers of energy demand e.g.  
 1075 economic growth. It is a partial equilibrium model, so balances supply and demand within the  
 1076 energy system, finding the least-cost solution for an energy system that meets future demand for  
 1077 energy services, such as space heating and cooling, mobility, and industrial production output.

1078 A key feature of the model is that it is constructed from the technology level up, meaning that many  
 1079 of the system components e.g. refineries, vehicles, power stations, can be represented, including  
 1080 their performance and costs. An advantage of TIMES is that it can assess the role of these many  
 1081 different components within an interconnected system, exploring trade-offs, and dependencies, and  
 1082 providing a consistent assessment of the system as a whole. TIMES is also known as an E3 model,  
 1083 meaning that it provides metrics on the physical energy system (technology capacity, system  
 1084 operation, energy use totals), on the economics of the system (investment requirements, energy  
 1085 costs), and on the environmental impacts (GHGs).

1086 TIAM-UCL, as typical of a TIMES model, is made up of five key components, as shown in  
 1087 Supplementary Figure 17. The first stage is the definition of what the system looks like (model  
 1088 structure), including the sectors to be included, typically from primary production through  
 1089 conversion to end use, types of technologies, and available energy resources. A Reference Energy  
 1090 System links all of these components together, allowing for the flow of energy through the system.  
 1091 Structure definition also include the spatio-temporal resolution e.g. number of regions, the number  
 1092 of time periods, and the time horizon over which the model is going to be run.

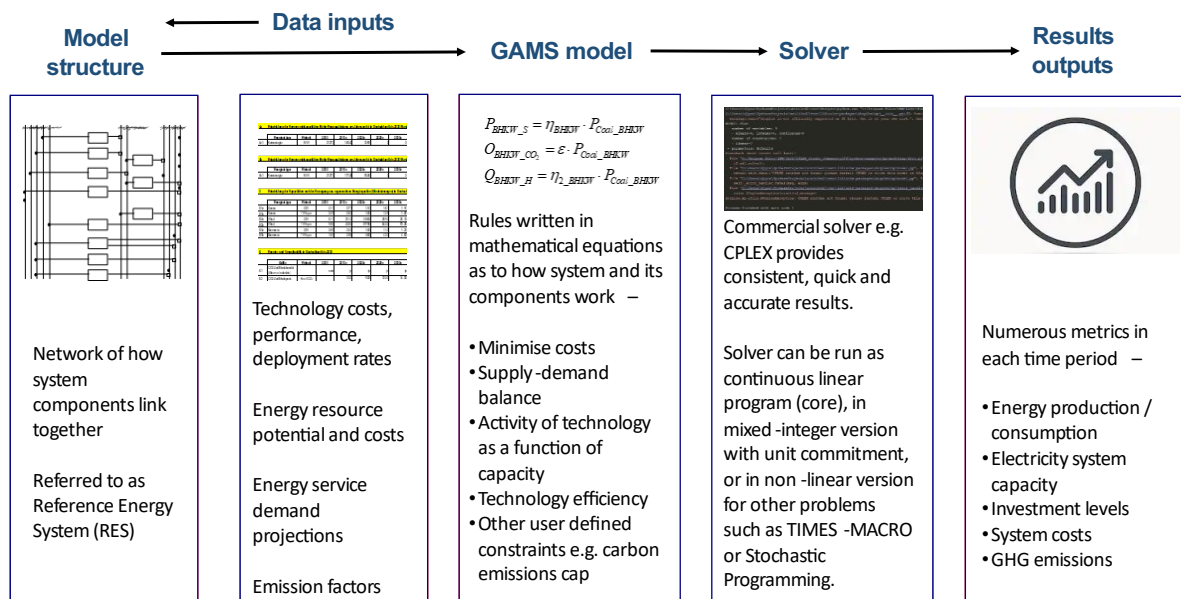

1093

1094 **Supplementary Figure 17. Core components of the TIMES model framework**

1095 Each part of the model system is populated with data assumptions, including technology costs and  
 1096 performance, resource availability and cost, the demands that the system needs to meet today and  
 1097 in the future, and the associated emissions of different fuel-technologies.

1098 The model input data are then used to construct a linear programme (using GAMS code), whereby  
 1099 the rules of the system operation and evolution are defined based on a set of mathematical  
 1100 equations. The linear programme is then solved to explore the least-cost energy system required to

1101 meet the energy service demands in the future, subject to constraints. A large number of metrics  
 1102 result that describe the emerging energy system, in terms of the physical system (number of  
 1103 vehicles, power system capacity, total bioenergy use), the costs of that system, and the emissions  
 1104 resulting from the system's operation.

1105 This section now focuses on the core equations used in the linear programme. This code is available  
 1106 on Github, with full documentation available on the ETSAP website<sup>62</sup>.

1107 In simple terms, an optimisation model such as TIAM-UCL will –

- 1108 • Minimise the objective function (total system costs)
- 1109 • whilst satisfying the energy service demand requirements
- 1110 • and respecting the system constraints

1111

1112 The key equations that set the rules of the model LP (linear programming) problem are summarised  
 1113 below:

- 1114 • Objective function (EQ\_OBJ). The function is to minimise total discounted system costs.

$$\text{Min} \sum_y \text{disc}_y \left[ \sum_p \sum_{ts} \cdot \text{varom}_{y,p,ts} \cdot \text{ACT}_{y,p,ts} + \sum_p \text{crf}_{y,p} \cdot \text{invcost}_{y,p} \cdot \text{NCAP}_{y,p} + \sum_p \text{fixom}_{y,p} \cdot \text{CAP}_{y,p} \right. \\
 \left. + \sum_c \sum_{ts} \text{impprice}_{y,c,ts} \cdot \text{IMP}_{y,c,ts} - \sum_c \sum_{ts} \text{expprice}_{y,c,ts} \cdot \text{EXP}_{y,c,ts} + \sum_c \sum_p \sum_{ts} \text{flocost}_{y,p,c,ts} \cdot \text{FLO}_{y,p,c,ts} \right]$$

1115

1116

1117 Where *disc* is the global discount rate, *varom* is the variable O&M costs associated with  
 1118 technology activity (*ACT*), *invcost* is the capital expenditure associated with new investment  
 1119 (*NCAP*), discounted using the *crf* (capital recovery factor), *impprice* is the price of imports,  
 1120 multiplied by import level (*IMP*), *expprice* is the price of exports, multiplied by export level  
 1121 (*EXP*), and *flocost* is the cost of other domestic energy commodities (*FLO*).

1122 Where index *y* is year, *p* is process (technology), *c* is energy commodity, and *ts* is time  
 1123 segment.

1124

- 1125 • Commodity balance (EQ(l)\_COMBAL). This equation ensures that the production of a  
 1126 commodity is equal to its consumption, to balance commodity markets.

$$\sum_{p \in \text{Production}} \sum_{ts} \text{FLO}_{t,p,c,ts} + \sum_{ts} \text{IMP}_{t,c,ts} = \sum_{p \in \text{Consumption}} \sum_{ts} \text{FLO}_{t,p,c,ts} + \sum_{ts} \text{EXP}_{t,c,ts}$$

1127

1128

- 1129 • Transformation equation (EQ\_PTRANS). This establishes the relationship between an input  
 1130 commodity to a technology and an output commodity e.g. technology efficiency

$$\eta_{t,p,cin,cout,ts} \cdot \text{FLO}_{t,p,cin,ts} = \text{FLO}_{t,p,cout,ts}$$

1131

1132

1133 Where  $\eta$  is the efficiency factor, and  $\text{FLO}_{cin}$  and  $\text{FLO}_{cout}$  represent the input and output  
 1134 commodities of a technology.

1135

- 1136 • Product allocation constraint (EQ(I)\_INSHR/OUTSHR). Allows for the control of different  
 1137 commodity shares, where there are more than one input or output commodities into a  
 1138 technology.

$$\frac{FLO_{t,p,com,ts}}{\sum_{c \in cg} FLO_{t,p,c,ts}} \leq (=, \geq) floshar_{t,p,com,cg,ts,bd}$$

1139  
 1140 Where *floshar* defines the share of the single commodity (numerator) over the sum of  
 1141 commodities (denominator), or commodity group (index *cg*).

- 1142  
 1143 • Activity definition (EQ\_ACTFLO). Activity of a technology is a function of the commodity flow,  
 1144 either of inputs but more typically outputs.

$$ACT_{t,p,ts} = FLO_{t,p,c,ts}$$

- 1145  
 1146  
 1147 • Utilization constraint (EQ\_CAPACT). Ensures that the activity of a technology is a function of  
 1148 its capacity

$$ACT_{t,p,ts} \leq \alpha_{t,p,ts} \cdot CAP_{t,p}$$

1149  
 1150  
 1151 While the above equations constitute the key set used in the linear programme, a full listing can be  
 1152 found in Loulou et al. (2016)<sup>62</sup>, in Table 24. These include specific equations that bound capacity,  
 1153 activity and commodity production, set the rules for the operation of storage technologies, or  
 1154 ensures capacity exceeds demand for a selected commodity in a given time period (often used to  
 1155 ensure a peak margin for electricity systems).

1156 User defined equations can also be built to provide more control over the model operation. Most  
 1157 are built using the standard LHS form, where the left hand side of the equation includes the  
 1158 variables to be controlled, while the right hand side (RHS) set the rule e.g. must be greater than 10%  
 1159 of total generation (share) or less than 50 GW capacity (absolute). Other user constraints are more  
 1160 dynamic in nature e.g. growth constraints that set % changes on the preceding period levels. For the  
 1161 purpose of modelling fossil fuels in a 1.5°C world, important constraints used to represent  
 1162 production growth and decline were outlined in Section 5 (“Key Upstream Constraints”).

1163  
 1164  
 1165

1166 **SI section 8. Correction of original unextractable estimates**

1167 This section provides a detailed description of the author correction to the original manuscript  
1168 'Unextractable fossil fuels in a 1.5°C world'. We provide the source of the off-model calculation error  
1169 and show the differences between the corrected and original estimates. The vast majority of the  
1170 original analysis (unextractable reserves for coal, unextractable resource estimates for all fossil fuels,  
1171 production pathways) remains exactly the same.

1172  
1173 We start with the Equations by which our unextractable estimates of reserves (Equation 1) and  
1174 resources (Equation 2) are calculated. Our *unextractable resource* estimates in the corrected  
1175 calculation have not changed because total modelled production is the same (Equation 2). It is the  
1176 volume of production from proved reserves which has been corrected (Equation 1).  
1177  
1178

$$UnextractableReserves_{2050} = 1 - \left( \frac{\sum_{t=2018}^{2050} Production_{ProvedReserves}}{ProvedReserves_{2018}} \right) \quad \text{(Equation 1)}$$

1179  
1180  
1181  
1182  
1183

Where:

UnextractableReserves<sub>2050</sub> = proportion of the 2018 reserve base which remains unextracted in 2050

1184  
1185  
1186  
1187  
1188

Production<sub>ProvedReserves</sub> = production from the estimated proved reserve base for each geological/resource category in each region

1189 ProvedReserves<sub>2018</sub> = proved reserves in each region in 2018

1190  
1191

1192 Similarly, for unextractable fossil fuel resources, we used the following formula as shown in Equation  
1193 2:  
1194

$$UnextractableResources_{2050} = 1 - \left( \frac{\sum_{t=2018}^{2050} Production_{Resources}}{Resources_{2018}} \right) \quad \text{(Equation 2)}$$

1195  
1196  
1197  
1198  
1199

Where:

1200 UnextractableResources<sub>2050</sub> = proportion of the 2018 resource base which remains unextracted in  
1201 2050  
1202  
1203  
1204

1205 Production<sub>Resources</sub> = production from the total resource base in each region

1206  
1207

Resources<sub>2018</sub> = total resource base in each region in 2018

1208  
1209  
1210  
1211  
1212

Our off model error arose from that fact that, for some categories of oil and gas (as explained further below), our estimate mistakenly reduced the available volume of production from our proved reserve base in 2018. Therefore, whilst total cumulative production from these categories has not changed meaning the results from Equation 2 are unaffected (i.e. in relation to the total

1213 resource base), a higher share of this production needed to be assigned to proved reserves. This led  
 1214 to the overestimate of unextractable reserves (Equation 1) in some regions.

1215

1216 Our reserve base year is 2018 and our modelled cumulative production calculation starts in 2018.  
 1217 However, our results sheet, in which we estimate unextractable values, has production results  
 1218 starting in 2010. This is because the TIAM-UCL model, is run for the period 2005-2100, with  
 1219 production up to 2018 calibrated to historical data. Therefore in our off model calculation, we  
 1220 needed to assign production from 2010 to 2018 to the “reserve category”, so that our available base  
 1221 reserves in 2018 are the quoted volumes in the paper (1276 Gb for oil, 155 tcm for fossil methane  
 1222 gas, and 931 Gtce for coal).

1223

1224 For conventional oil and gas, proved reserves are explicitly modelled in the supply cost curves and  
 1225 therefore these categories are unaffected. However, for specific categories of oil and gas including  
 1226 light tight oil, shale gas, tight gas and coalbed methane, there is no distinction between reserves and  
 1227 resources for those categories in the supply cost curve used in our model. Instead, reserves are  
 1228 assigned in our off-model calculations. This is due to proved reserves from these categories being  
 1229 limited to a small number of countries, as well as relatively limited data from which to conduct a full  
 1230 uncertainty analysis of the volume of proved reserves. In short, proved reserves from the categories  
 1231 identified above are not explicitly included in the model supply cost curves.

1232

1233 Additionally, the supply cost steps for the specific categories identified above are derived from a  
 1234 detailed bottom-up analysis of cost depletion curves and therefore current production (i.e. reserves)  
 1235 from these categories are implicitly taken into account. However, once cumulative production  
 1236 exceeds the allocated volume of reserves for these categories, production is assigned from the wider  
 1237 resource base. This resulted in lower cumulative production from estimated proved reserves from  
 1238 2018 onwards, and therefore a higher proportion of reserves estimated to be ‘unextractable’  
 1239 (Equation 1) within the carbon budget.

1240

1241 We provide the following example to highlight both the source of the error and correction for  
 1242 proved reserves of non-associated dry shale gas in the US as laid out in Supplementary Table 27.

1243

1244 **Supplementary Table 27: Defining and correcting the off-model error in unextractable reserves**

1245

|                                                                           |         |                                                                                                                                                                                                                                                                                                                                                                                                                                      |
|---------------------------------------------------------------------------|---------|--------------------------------------------------------------------------------------------------------------------------------------------------------------------------------------------------------------------------------------------------------------------------------------------------------------------------------------------------------------------------------------------------------------------------------------|
| Proved shale gas reserves estimate (2018)                                 | 5 tcm   | This is our starting estimate of proved reserves.                                                                                                                                                                                                                                                                                                                                                                                    |
| Historical cumulative shale gas production (2010-18)                      | 3.1 tcm | This is historical shale gas production between 2010-2018.                                                                                                                                                                                                                                                                                                                                                                           |
| Modelled cumulative shale gas production (2018-2050)                      | 6 tcm   | Total cumulative shale gas production (i.e. from shale gas reserves and the wider resource base) for the period 2018-2050 based on our modelling                                                                                                                                                                                                                                                                                     |
| <b>ERROR IN OUR PUBLISHED ESTIMATES</b>                                   |         |                                                                                                                                                                                                                                                                                                                                                                                                                                      |
| Off-model estimate of production from proved shale gas reserves 2018-2050 | 1.9 tcm | In our published estimates, only 1.9 tcm of cumulative production was from proved reserves with the additional 4.1 tcm from the wider technically recoverable resource base. The error occurred because 2010-2018 production from shale gas reserves of 3.1 tcm was mistakenly netted off the 2018 reserve base (i.e. there was only 1.9 tcm of available production from designated shale gas reserves, instead of the full 5 tcm). |
| <b>CORRECTION IN NEW ESTIMATES</b>                                        |         |                                                                                                                                                                                                                                                                                                                                                                                                                                      |
| Off-model estimate of production from proved shale gas reserves 2018-2050 | 5 tcm   | In the corrected case 5 tcm of cumulative production is from proved reserves with the additional 1 tcm from the wider technically recoverable resource base.                                                                                                                                                                                                                                                                         |

| CORRECTED UNEXTRACTABLE ESTIMATE             |          |                                                                                                                                                                                                                                                                                                                                                                                              |
|----------------------------------------------|----------|----------------------------------------------------------------------------------------------------------------------------------------------------------------------------------------------------------------------------------------------------------------------------------------------------------------------------------------------------------------------------------------------|
| Unextractable total US gas reserves, tcm (%) | 2.8 (24) | The difference in US unextractable fossil methane gas reserves from the incorrect published estimates (5.9 tcm (52%)) is therefore exactly the difference from higher shale gas production from designated reserves in the corrected version (i.e. an additional 3.1 tcm of cumulative production have been correctly reclassified as from proved shale gas reserves rather than resources). |

1246

1247 It should be noted that in both the published and our corrected results, US fossil methane gas  
1248 production is exactly the same (declining at an annual average rate of ~ 8% per year), but more of  
1249 this fossil methane gas is assigned to come from proved reserves rather than the wider resource  
1250 base.

1251

1252 For full transparency, Supplementary Table 28 and 29 below show the percentage and absolute  
1253 changes in unextractable reserves (regional and global) for oil and gas, respectively. This takes into  
1254 account the corrections for each of the categories identified: light tight oil, shale gas, tight gas and  
1255 coalbed methane. The correction follows the exact same steps as the example provided for US shale  
1256 gas above.

1257

1258

1259 **Supplementary Table 28: Regional and global difference in unextractable oil reserves after**  
1260 **accounting error has been fixed**

| Region        | Unextractable oil in 2050 (2100), Gb | Unextractable oil in 2050 (2100), % | Change in unextractable oil from original manuscript in 2050, Gb (%) | Change in unextractable oil from original manuscript in 2100, Gb (%) | Category corrected |
|---------------|--------------------------------------|-------------------------------------|----------------------------------------------------------------------|----------------------------------------------------------------------|--------------------|
| United States | 18 (14)                              | 26 (20)                             | -3.7 (-5%)                                                           | -3.7 (-5%)                                                           | Light tight oil    |
| Global        | 740 (541)                            | 58 (42)                             | -3.7 (0%)                                                            | -3.7 (-1%)                                                           |                    |

1261

1262

1263 For gas, the recalibrated allocation of unconventional reserves impacts the following regions where  
1264 unconventional gas forms a proportion of the reserve base, as shown in Supplementary Table 29  
1265 below. Globally for gas, the proportion of reserves which must remain unextracted falls from 59% to  
1266 56% by 2050, and from 50% to 47% by 2100.

1267

1268 **Supplementary Table 29: Regional and global difference in unextractable gas fossil methane**  
1269 **reserves after accounting error has been fixed**

| Region          | Unextractable gas in 2050 (2100), tcm | Unextractable gas in 2050 (2100), % | Change in unextractable gas from original manuscript in 2050, tcm (%) | Change in unextractable gas from original manuscript in 2100, tcm (%) | Category corrected               |
|-----------------|---------------------------------------|-------------------------------------|-----------------------------------------------------------------------|-----------------------------------------------------------------------|----------------------------------|
| Australia       | 0.7 (0.6)                             | 29 (25)                             | -0.1 (-6%)                                                            | -0.1 (-6%)                                                            | Coalbed methane                  |
| Canada          | 1.1 (1.1)                             | 56 (56)                             | -0.5 (-25%)                                                           | -0.5 (-25%)                                                           | Tight gas                        |
| China and India | 1.3 (1.1)                             | 29 (24)                             | -0.4 (-6%)                                                            | -0.4 (-8%)                                                            | Tight gas                        |
| USA             | 2.8 (2.8)                             | 24 (24)                             | -3.1 (-28%)                                                           | -3.1 (-28%)                                                           | Shale, tight and coalbed methane |
| Global          | 87 (73)                               | 56 (47)                             | -4.1 (-3%)                                                            | -4.1 (-3%)                                                            |                                  |

1270

1271 N.B. the negative change reflects lower unextractable volumes and proportions of gas reserves in these  
1272 regions, i.e. higher production from designated reserves.

1273

1274

1275

1276

1277

1278

1279

1280

1281

1282

1283

1284

1285

1286

1287

1288

1289

1290

1291

1292

1293

1294

1295

1296

1297

1298

1299

1300

1301

1302



1303 **References**

- 1304 1. McGlade, C. & Ekins, P. The geographical distribution of fossil fuels unused when limiting  
1305 global warming to 2 °C. *Nature* **517**, 187–190 (2015).
- 1306 2. IRENA International Renewable Energy Agency. *Renewable Power Generation Costs in 2017*.  
1307 *International Renewable Energy Agency* (2018). doi:10.1007/SpringerReference\_7300.
- 1308 3. Eureka, K. *et al.* *An Improved Global Wind Resource Estimate for Integrated Assessment*  
1309 *Models*. <https://www.nrel.gov/docs/fy17osti/65323.pdf> (2017).
- 1310 4. IEA PVPS. *Trends 2018 in Photovoltaic applications. Survey Report of Selected IEA Countries*  
1311 *between 1992 and 2014* [https://iea-pvps.org/wp-content/uploads/2020/01/2018\\_iea-](https://iea-pvps.org/wp-content/uploads/2020/01/2018_iea-pvps_report_2018.pdf)  
1312 [pvps\\_report\\_2018.pdf](https://iea-pvps.org/wp-content/uploads/2020/01/2018_iea-pvps_report_2018.pdf) (2018).
- 1313 5. Budinis, S., Krevor, S., Mac Dowell, N., Brandon, N. & Hawkes, A. *Can technology unlock*  
1314 *unburnable carbon?* <https://core.ac.uk/download/pdf/146459805.pdf> (2016).
- 1315 6. Grubler, A. *et al.* A low energy demand scenario for meeting the 1.5 °C target and sustainable  
1316 development goals without negative emission technologies. *Nat. Energy* **3**, 515–527 (2018).
- 1317 7. Huppmann, D., Rogelj, J., Kriegler, E., Krey, V. & Riahi, K. A new scenario resource for  
1318 integrated 1.5 °C research. *Nat. Clim. Chang.* **8**, 1027–1030 (2018).
- 1319 8. IEA. *World Energy Outlook 2019*. (2019).
- 1320 9. McGlade, C. Uncertainties in the outlook for oil and gas. *Doctoral thesis, UCL (University*  
1321 *College London)*. (2013).
- 1322 10. Welsby, D. Modelling uncertainty in global gas resources and markets (forthcoming).  
1323 (University College London, 2021).
- 1324 11. Rystad. Rystad Energy’s annual review of world oil resources: Recoverable oil loses 282 billion  
1325 barrels as Covid-19 hastens peak oil. (2020).
- 1326 12. BP. *Statistical Review of World Energy*. [https://www.bp.com/content/dam/bp/business-](https://www.bp.com/content/dam/bp/business-sites/en/global/corporate/pdfs/energy-economics/statistical-review/bp-stats-review-2020-full-report.pdf)  
1327 [sites/en/global/corporate/pdfs/energy-economics/statistical-review/bp-stats-review-2020-](https://www.bp.com/content/dam/bp/business-sites/en/global/corporate/pdfs/energy-economics/statistical-review/bp-stats-review-2020-full-report.pdf)  
1328 [full-report.pdf](https://www.bp.com/content/dam/bp/business-sites/en/global/corporate/pdfs/energy-economics/statistical-review/bp-stats-review-2020-full-report.pdf) (2020).
- 1329 13. EIA. Annual crude and lease condensate reserves. *EIA International energy database*  
1330 <https://www.eia.gov/international/data/world/world/petroleum-and-other-liquids> (2021).
- 1331 14. OPEC. *OPEC Annual Statistical Bulletin 2019*.  
1332 [https://www.opec.org/opec\\_web/static\\_files\\_project/media/downloads/publications/ASB\\_2](https://www.opec.org/opec_web/static_files_project/media/downloads/publications/ASB_2019.pdf)  
1333 [019.pdf](https://www.opec.org/opec_web/static_files_project/media/downloads/publications/ASB_2019.pdf) (2019).
- 1334 15. BGR. *BGR Energy Study 2019: Data and Developments Concerning German and Global Energy*  
1335 *Supplies*.  
1336 [https://www.bgr.bund.de/EN/Themen/Energie/Downloads/energiestudie\\_2019\\_en.pdf;jsess](https://www.bgr.bund.de/EN/Themen/Energie/Downloads/energiestudie_2019_en.pdf;jsessionid=A73E36C969C2253E194ADF4E2484C95A.1_cid321?__blob=publicationFile&v=6)  
1337 [ionid=A73E36C969C2253E194ADF4E2484C95A.1\\_cid321?\\_\\_blob=publicationFile&v=6](https://www.bgr.bund.de/EN/Themen/Energie/Downloads/energiestudie_2019_en.pdf;jsessionid=A73E36C969C2253E194ADF4E2484C95A.1_cid321?__blob=publicationFile&v=6) (2020).
- 1338 16. Ihejirika, N. *The Canadian Oilsands and Strategic Approaches to Profitability*.  
1339 [https://www.oxfordenergy.org/wpcms/wp-content/uploads/2019/08/The-Canadian-](https://www.oxfordenergy.org/wpcms/wp-content/uploads/2019/08/The-Canadian-Oilsands-and-Strategic-Approaches-to-Profitability-Insight-56.pdf)  
1340 [Oilsands-and-Strategic-Approaches-to-Profitability-Insight-56.pdf](https://www.oxfordenergy.org/wpcms/wp-content/uploads/2019/08/The-Canadian-Oilsands-and-Strategic-Approaches-to-Profitability-Insight-56.pdf) (2019).
- 1341 17. Bloomberg. Costs of Canadian Oil Sands Projects Fell Dramatically in Recent Years; But  
1342 Pipeline Constraints and other Factors Will Moderate. *Bloomberg News*  
1343 <https://www.bloomberg.com/press-releases/2019-05-01/costs-of-canadian-oil-sands->

- 1344 projects-fell-dramatically-in-recent-years-but-pipeline-constraints-and-other-factors-will-  
1345 moderate (2019).
- 1346 18. Gautier, D. . & Moore, T. . Introduction to the 2008 Circum-Arctic Resource Appraisal (CARA)  
1347 professional paper. in *The 2008 Circum-Arctic Resource Appraisal: U.S. Geological Survey*  
1348 *Professional Paper 1824* (eds. Gautier, D. . & Moore, T. .) (USGS, 2017). doi:10.3133/pp1824A.
- 1349 19. NETL. AAPG Datapages: Giant Oil and Gas Fields of the World.  
1350 <https://edx.netl.doe.gov/dataset/aapg-datapages-giant-oil-and-gas-fields-of-the-world>  
1351 (2014).
- 1352 20. Analytical Centre for the Government of the Russian Federation. *Russian Energy 2015*.  
1353 <https://ac.gov.ru/files/publication/a/10205.pdf> (2016).
- 1354 21. IEA. *Natural gas Information 2019*. [https://www.iea.org/reports/natural-gas-information-](https://www.iea.org/reports/natural-gas-information-2019)  
1355 2019 (2019).
- 1356 22. EIA. Dry natural gas reserves. *EIA International energy database*  
1357 <https://www.eia.gov/international/data/world> (2021).
- 1358 23. IEA. *World Energy Outlook 2020*. (2020).
- 1359 24. Attanasi, E. . & Freeman, P. . *Role of stranded gas in increasing global gas supplies: U.S.*  
1360 *Geological Survey Open-File Report 2013–1044*. <http://pubs.usgs.gov/of/2013/1044> (2013).
- 1361 25. Klett, T. R., Cook, T. A., Charpentier, R. R., Tennyson, M. E. & Le, P. . *U.S. Geological Survey*  
1362 *assessment of reserve growth outside of the United States: U.S. Geological Survey Scientific*  
1363 *Investigations Report 2015–5091*. <https://pubs.usgs.gov/sir/2015/5091/sir20155091.pdf>  
1364 (2015).
- 1365 26. Brownfield, M. *et al.* *An Estimate of Undiscovered Conventional Oil and Gas Resources of the*  
1366 *World, 2012*. <https://pubs.usgs.gov/fs/2012/3042/fs2012-3042.pdf> (2012).
- 1367 27. EIA. *Technically Recoverable Shale Oil and Shale Gas Resources: An Assessment of 137 Shale*  
1368 *Formations in 41 Countries Outside the United States*.  
1369 <https://www.eia.gov/analysis/studies/worldshalegas/pdf/overview.pdf> (2013).
- 1370 28. EIA. *Annual Energy Outlook 2020*. <https://www.eia.gov/outlooks/aeo/pdf/aeo2020.pdf>  
1371 (2020).
- 1372 29. Medlock, K. Shale Gas, Emerging Fundamentals, and Geopolitics. (2012).
- 1373 30. Wang, J., Mohr, S., Feng, L., Liu, H. & Tverberg, G. E. Analysis of resource potential for China’s  
1374 unconventional gas and forecast for its long-term production growth. *Energy Policy* **88**, 389–  
1375 401 (2016).
- 1376 31. APEC. *Effective Coalbed Methane (CBM) Recovery Technologies for APEC Developing*  
1377 *Economies*. (2018).
- 1378 32. EIA. Coal reserves. *EIA International energy database*  
1379 <https://www.eia.gov/international/data/world> (2021).
- 1380 33. Remme, U., Blesl, M. & Fahl, U. *Global resources and energy trade: An overview for coal,*  
1381 *natural gas, oil and uranium*. <https://d-nb.info/1027991858/34> (2007).
- 1382 34. EIA. *Technically Recoverable Shale Oil and Shale Gas Resources: Argentina*.  
1383 [https://www.eia.gov/analysis/studies/worldshalegas/pdf/Argentina\\_2013.pdf](https://www.eia.gov/analysis/studies/worldshalegas/pdf/Argentina_2013.pdf) (2015).
- 1384 35. World Coal Association. Steel production. <https://www.worldcoal.org/coal-facts/coal-steel/>

- 1385 (2020).
- 1386 36. EIA. *Trends in U.S. Oil and Natural Gas Upstream Costs*.  
1387 <https://www.eia.gov/analysis/studies/drilling/pdf/upstream.pdf> (2016).
- 1388 37. AER. *Natural Gas Supply Costs*. <https://www.aer.ca/providing-information/data-and-reports/statistical-reports/st98/natural-gas/supply-costs> (2018).  
1389
- 1390 38. Carbon Limits. *Associated Petroleum Gas Flaring Study for Russia, Kazakhstan, Turkmenistan  
1391 and Azerbaijan*. [https://www.ebrd.com/downloads/sector/sei/ap-gas-flaring-study-final-  
1392 report.pdf](https://www.ebrd.com/downloads/sector/sei/ap-gas-flaring-study-final-report.pdf) (2013).
- 1393 39. IPA Advisory. *Middle East Natural Gas: Is price administration a hurdle to gas development?*  
1394 [http://ipaadvisory.co.uk/media/1144/middle-east-gas-pricing-15\\_08\\_11.pdf](http://ipaadvisory.co.uk/media/1144/middle-east-gas-pricing-15_08_11.pdf) (2015).
- 1395 40. OJG. Nigerian operator lets contract for gas processing plant. *Oil and Gas Journal*  
1396 [https://www.ogj.com/refining-processing/article/17250582/nigerian-operator-lets-contract-  
1397 for-gas-processing-plant](https://www.ogj.com/refining-processing/article/17250582/nigerian-operator-lets-contract-for-gas-processing-plant) (2016).
- 1398 41. Santley, D., Schlotterer, R. & Eberhard, A. *Harnessing African Natural Gas: A New Opportunity  
1399 for Africa's Energy Agenda?* <http://www.gsb.uct.ac.za/files/harnessingafricangasfinal.pdf>  
1400 (2014).
- 1401 42. Aissaoui, A. *Algerian Gas: Troubling Trends, Troubled Policies*.  
1402 [https://www.oxfordenergy.org/wpcms/wp-content/uploads/2016/05/Algerian-Gas-  
1403 Troubling-Trends-Troubled-Policies-NG-108.pdf?v=79cba1185463](https://www.oxfordenergy.org/wpcms/wp-content/uploads/2016/05/Algerian-Gas-Troubling-Trends-Troubled-Policies-NG-108.pdf?v=79cba1185463) (2016).
- 1404 43. IMCO. *A changing world: Mexico facing the 21st century energy revolution*.  
1405 [https://www.wilsoncenter.org/sites/default/files/media/documents/event/energy\\_mexico\\_i  
1406 mco.pdf](https://www.wilsoncenter.org/sites/default/files/media/documents/event/energy_mexico_imco.pdf) (2014).
- 1407 44. Canada Energy Regulator. Market Snapshot: Natural gas plays an important role in Alberta's  
1408 oil sands. [https://www.cer-rec.gc.ca/en/data-analysis/energy-markets/market-  
1409 snapshots/2017/market-snapshot-natural-gas-plays-important-role-in-albertas-oil-sands.html](https://www.cer-rec.gc.ca/en/data-analysis/energy-markets/market-snapshots/2017/market-snapshot-natural-gas-plays-important-role-in-albertas-oil-sands.html)  
1410 (2017).
- 1411 45. BP. *BP statistical review of world energy*. [https://www.bp.com/content/dam/bp/business-  
1412 sites/en/global/corporate/pdfs/energy-economics/statistical-review/bp-stats-review-2019-  
1413 full-report.pdf](https://www.bp.com/content/dam/bp/business-sites/en/global/corporate/pdfs/energy-economics/statistical-review/bp-stats-review-2019-full-report.pdf) (2019).
- 1414 46. IEA. *Coal Information 2019*. <https://www.iea.org/reports/coal-information-2019> (2019).
- 1415 47. IGU. *World LNG Report 2019*. [https://www.igu.org/sites/default/files/node-news\\_item-  
1416 field\\_file/IGU Annual Report 2019\\_23 loresfinal.pdf](https://www.igu.org/sites/default/files/node-news_item-field_file/IGU%20Annual%20Report%202019_23_loresfinal.pdf) (2019).
- 1417 48. IGU. *Global natural gas insights*. <https://www.igu.org/global-natural-gas-insights> (2019).
- 1418 49. Songhurst, B. *LNG plant cost escalation*. [https://www.oxfordenergy.org/wpcms/wp-  
1419 content/uploads/2014/02/NG-83.pdf?v=79cba1185463](https://www.oxfordenergy.org/wpcms/wp-content/uploads/2014/02/NG-83.pdf?v=79cba1185463) (2014).
- 1420 50. Songhurst, B. *LNG Plant Cost Reduction 2014–18*. [https://www.oxfordenergy.org/wpcms/wp-  
1421 content/uploads/2018/10/LNG-Plant-Cost-Reduction-2014–18-NG137.pdf?v=79cba1185463  
1422](https://www.oxfordenergy.org/wpcms/wp-content/uploads/2018/10/LNG-Plant-Cost-Reduction-2014–18-NG137.pdf?v=79cba1185463) (2018).
- 1423 51. McGlade, C., Bradshaw, M., Anandarajah, G., Watson, J. & Ekins, P. *A Bridge to a Low-Carbon  
1424 Future? Modelling the Long-Term Global Potential of Natural Gas*.  
1425 <https://ukerc.ac.uk/publications/gas-as-a-bridge/> (2014).

- 1426 52. Hellenic Shipping News. Could LNG shipping spot rates hit \$250,000/day?  
1427 <https://www.hellenicshippingnews.com/could-lng-shipping-spot-rates-hit-250000-day/>  
1428 (2018).
- 1429 53. Pye, S., Price, J., Cronin, J., Butnar, I. & Welsby, D. *Modelling 'leadership - driven' scenarios of*  
1430 *the global mitigation effort*. [https://www.theccc.org.uk/publication/modelling-leadership-](https://www.theccc.org.uk/publication/modelling-leadership-driven-scenarios-of-the-global-mitigation-effort-ucl-energy-institute/)  
1431 [driven-scenarios-of-the-global-mitigation-effort-ucl-energy-institute/](https://www.theccc.org.uk/publication/modelling-leadership-driven-scenarios-of-the-global-mitigation-effort-ucl-energy-institute/) (2019).
- 1432 54. Riahi, K. *et al.* The Shared Socioeconomic Pathways and their energy, land use, and  
1433 greenhouse gas emissions implications: An overview. *Glob. Environ. Chang.* **42**, 153–168  
1434 (2017).
- 1435 55. Daioglou, V., Stehfest, E., Wicke, B., Faaij, A. & van Vuuren, D. P. Projections of the availability  
1436 and cost of residues from agriculture and forestry. *GCB Bioenergy* **8**, 456–470 (2016).
- 1437 56. Ricardo Energy & Environment. Biomass Feedstock Availability, Final Report for BEIS. *Ref*  
1438 *ED662421043 - Issue Number 3* (2017).
- 1439 57. Hoogwijk, M., Faaij, A., de Vries, B. & Turkenburg, W. Exploration of regional and global cost-  
1440 supply curves of biomass energy from short-rotation crops at abandoned cropland and rest  
1441 land under four IPCC SRES land-use scenarios. *Biomass and Bioenergy* **33**, 26–43 (2009).
- 1442 58. Dodds, P. & McDowall, W. *A review of hydrogen production technologies for energy system*  
1443 *models*. [https://www.lifestudy.ac.uk/bartlett/energy/research/themes/energy-](https://www.lifestudy.ac.uk/bartlett/energy/research/themes/energy-systems/hydrogen/WP6_Dodds_Production.pdf)  
1444 [systems/hydrogen/WP6\\_Dodds\\_Production.pdf](https://www.lifestudy.ac.uk/bartlett/energy/research/themes/energy-systems/hydrogen/WP6_Dodds_Production.pdf) (2012).
- 1445 59. Ekins, P. *et al.* *The role of CCS in meeting climate policy targets*.  
1446 [https://www.globalccsinstitute.com/resources/publications-reports-research/the-role-of-ccs-](https://www.globalccsinstitute.com/resources/publications-reports-research/the-role-of-ccs-in-meeting-climate-policy-targets/)  
1447 [in-meeting-climate-policy-targets/](https://www.globalccsinstitute.com/resources/publications-reports-research/the-role-of-ccs-in-meeting-climate-policy-targets/) (2017).
- 1448 60. Rubin, E. S., Davison, J. E. & Herzog, H. J. The cost of CO<sub>2</sub> capture and storage. *Int. J. Greenh.*  
1449 *Gas Control* **40**, 378–400 (2015).
- 1450 61. Butnar, I., Broad, O., Solano Rodriguez, B. & Dodds, P. E. The role of bioenergy for global deep  
1451 decarbonization: CO<sub>2</sub> removal or low-carbon energy? *GCB Bioenergy* **12**, 198–212 (2020).
- 1452 62. Loulou, R., Lehtilä, A., Kanudia, A., Remme, U. & Goldstein, G. *Documentation for the TIMES*  
1453 *Model: Part II*. [https://iea-etsap.org/docs/Documentation\\_for\\_the\\_TIMES\\_Model-Part-](https://iea-etsap.org/docs/Documentation_for_the_TIMES_Model-Part-II_July-2016.pdf)  
1454 [II\\_July-2016.pdf](https://iea-etsap.org/docs/Documentation_for_the_TIMES_Model-Part-II_July-2016.pdf) (2016).
- 1455
